# Supplementary material for: A Non-Targeted LC-MS Profiling Reveals Elevated Levels of Carnitine Precursors and Trimethylated Compounds in the Cord Plasma of Pre-Eclamptic Infants
Source: PubMed Central journal article supplement (PMC6168522; doi:10.1038/s41598-018-32804-5), 2018-10-02
Supplement: 41598_2018_32804_MOESM1_ESM.pdf [file 41598_2018_32804_MOESM1_ESM.pdf]

Supplementary information

**A NON-TARGETED LC-MS PROFILING REVEALS ELEVATED LEVELS OF CARNITINE PRECURSORS AND TRIMETHYLATED COMPOUNDS IN THE CORD PLASMA OF PRE-ECLAMPTIC INFANTS**

Tiina Jääskeläinen, Olli Kärkkäinen, Jenna Jokkala, Kaisa Litonius, Seppo Heinonen, Seppo Auriola, Marko Lehtonen, Kati Hanhineva, Hannele Laivuori for the FINNPEC

Supplementary table 1: Molecular features with p-value below 0.05 (ordered by p-value)

| Molecular feature   | HILIC/RP | Ionization mode | Mass      | RT    | Identification                                    | ID level | MSMS fragmentation                                                                                                                               | Control  |         | Preeclampsia |         | t-test   |       | Cohen's |       | PLS-DA |  | fold change |
|---------------------|----------|-----------------|-----------|-------|---------------------------------------------------|----------|--------------------------------------------------------------------------------------------------------------------------------------------------|----------|---------|--------------|---------|----------|-------|---------|-------|--------|--|-------------|
|                     |          |                 |           |       |                                                   |          |                                                                                                                                                  | Mean     | SD      | Mean         | SD      | p        | d     | VIP     |       |        |  |             |
| 246.0849@1.5598935  | HILIC    | -               | 246.0849  | 1.56  |                                                   |          |                                                                                                                                                  | 219516   | 31762   | 285503       | 50192   | 1.41E-11 | 1.61  | 2.84    | 1.30  |        |  |             |
| 99.0428@1.7425824   | HILIC    | +               | 99.0428   | 1.74  |                                                   |          |                                                                                                                                                  | 37273    | 15349   | 70305        | 35484   | 3.97E-11 | 1.30  | 2.58    | 1.86  |        |  |             |
| 189.1115@6.1605635  | HILIC    | +               | 189.1115  | 6.16  | Homocitrulline                                    | 2        | Hilic (+) 10ev: 190.1182 --> 173.0915 (100), 127.0868 (98), 84.0828 (46), 190.1242 (23)                                                          | 21621    | 8722    | 50291        | 35414   | 1.09E-10 | 1.30  | 2.29    | 2.07  |        |  |             |
| 60.0322@0.96027136  | HILIC    | +               | 60.0322   | 0.96  | Urea                                              | 1        | Hilic (+) 10ev: 61.0393 --> 44.0126 (100), 61.0391 (63)                                                                                          | 128725   | 27028   | 177308       | 36079   | 1.88E-10 | 1.54  | 2.82    | 1.38  |        |  |             |
| 309.0806@1.5604054  | HILIC    | -               | 309.0806  | 1.56  |                                                   |          |                                                                                                                                                  | 56028    | 15907   | 74561        | 11789   | 4.88E-10 | 1.34  | 2.58    | 1.25  |        |  |             |
| 161.0688@3.2028368  | HILIC    | -               | 161.0688  | 3.20  | Indolecarboxylic acid                             | 2        | Hilic (-) 20ev: 160.0613 --> 74.0245 (100), 98.0249 (54)                                                                                         | 49467    | 7949    | 64244        | 13873   | 1.07E-09 | 1.35  | 2.51    | 1.29  |        |  |             |
| 188.0451@3.3214035  | HILIC    | -               | 188.0451  | 3.32  |                                                   |          |                                                                                                                                                  | 154224   | 31668   | 198520       | 37724   | 9.71E-09 | 1.28  | 2.50    | 1.29  |        |  |             |
| 129.0538@2.0377033  | HILIC    | +               | 129.0538  | 2.04  |                                                   |          |                                                                                                                                                  | 25895    | 14683   | 49431        | 27734   | 1.74E-08 | 1.11  | 2.30    | 1.84  |        |  |             |
| 143.0945@4.1020107  | HILIC    | +               | 143.0945  | 4.10  |                                                   |          |                                                                                                                                                  | 140675   | 99995   | 306714       | 183385  | 3.49E-08 | 1.17  | 2.30    | 2.35  |        |  |             |
| 466.1327@1.8160769  | HILIC    | -               | 466.1327  | 1.82  |                                                   |          |                                                                                                                                                  | 112516   | 45244   | 60772        | 40799   | 5.21E-08 | -1.20 | 2.26    | -2.23 |        |  |             |
| 169.0851@6.2600594  | HILIC    | +               | 169.0851  | 6.26  | 1-methylhistidine                                 | 1        | Hilic (+) 10ev: 170.0928 --> 124.0871 (100), 170.0926 (39), 109.0757 (8), 96.0679 (5), 83.0615 (3)                                               | 1012731  | 241061  | 1419330      | 462953  | 6.75E-08 | 1.16  | 2.26    | 1.38  |        |  |             |
| 152.0586@1.495875   | RP       | +               | 152.0586  | 1.50  |                                                   |          |                                                                                                                                                  | 50515    | 24223   | 86975        | 32820   | 6.84E-08 | 1.28  | 2.49    | 1.78  |        |  |             |
| 128.0583@5.6848617  | HILIC    | +               | 128.0583  | 5.68  |                                                   |          |                                                                                                                                                  | 222708   | 65352   | 357427       | 176562  | 7.01E-08 | 1.11  | 2.06    | 1.52  |        |  |             |
| 123.0794@6.259089   | HILIC    | +               | 123.0794  | 6.26  | Fragment of 1-methylhistidine                     |          |                                                                                                                                                  | 74650    | 17929   | 105873       | 36551   | 1.12E-07 | 1.15  | 2.26    | 1.39  |        |  |             |
| 152.0584@0.757505   | HILIC    | +               | 152.0584  | 0.76  | Tentative 2PY (N-methyl-2-pyridone-5-carboxamide) | 3        | Hilic (+) 20ev: 153.0661 --> 108.0451 (100), 153.0661 (95), 92.0501 (95), 136.0392 (93), 110.0589 (63), 53.0389 (42), 39.0227 (17), 80.0486 (16) | 248111   | 115913  | 412210       | 144650  | 1.26E-07 | 1.26  | 2.47    | 1.72  |        |  |             |
| 135.0319@0.7583886  | HILIC    | +               | 135.0319  | 0.76  | Fragment of tentative 2PY                         |          |                                                                                                                                                  | 262332   | 124448  | 437700       | 154689  | 1.42E-07 | 1.26  | 2.47    | 1.73  |        |  |             |
| 72.0575@0.73860157  | HILIC    | -               | 72.0575   | 0.74  | Hydroxyisovaleric acid [M-COOH]                   | 2        | Hilic (-) 10ev: 117.0557 --> 71.0495 (100), 117.0569 (65), 80.0324 (12)                                                                          | 240253   | 65210   | 325401       | 101084  | 1.51E-07 | 1.02  | 2.03    | 1.39  |        |  |             |
| 258.0852@1.1630198  | HILIC    | -               | 258.0852  | 1.16  |                                                   |          |                                                                                                                                                  | 49302    | 9278    | 63488        | 14029   | 1.55E-07 | 1.22  | 2.37    | 1.28  |        |  |             |
| 182.058@1.0825481   | HILIC    | -               | 182.0580  | 1.08  | p-Hydroxyphenyllactic acid                        | 2        | Hilic (-) 20ev: 181.0508 --> 135.0453 (100), 57.9755 (71), 119.0506 (47)                                                                         | 55698    | 21852   | 82086        | 30516   | 5.16E-07 | 1.01  | 2.04    | 1.48  |        |  |             |
| 113.0588@1.2412335  | HILIC    | +               | 113.0588  | 1.24  | Creatinine                                        | 1        | Hilic (+) 10ev: 114.0664 --> 114.0667 (100), 44.0495 (79), 86.0714 (11)                                                                          | 14061144 | 2744481 | 17035158     | 2972637 | 1.33E-06 | 1.04  | 2.14    | 1.22  |        |  |             |
| 563.4307@1.1281083  | HILIC    | +               | 563.4307  | 1.13  |                                                   |          |                                                                                                                                                  | 78369    | 22577   | 60826        | 14791   | 1.56E-06 | -0.94 | 1.84    | -1.31 |        |  |             |
| 512.2974@3.2875962  | HILIC    | -               | 512.2974  | 3.29  |                                                   |          |                                                                                                                                                  | 207976   | 78238   | 337772       | 158474  | 1.84E-06 | 1.10  | 2.33    | 1.56  |        |  |             |
| 500.2078@5.987612   | RP       | -               | 500.2078  | 5.99  |                                                   |          |                                                                                                                                                  | 108305   | 36145   | 69529        | 40412   | 2.43E-06 | -1.01 | 2.02    | -1.72 |        |  |             |
| 286.2371@5.938252   | HILIC    | +               | 286.2371  | 5.94  | Diacetylpermidine                                 | 2        | Hilic (+) 10ev: 287.2440 --> 287.2441 (100), 171.1489 (98), 100.0756 (51), 269.2333 (13), 112.1123 (4)                                           | 192954   | 81290   | 374328       | 240967  | 2.63E-06 | 1.13  | 2.06    | 1.75  |        |  |             |
| 366.1498@7.378337   | RP       | -               | 366.1498  | 7.38  |                                                   |          |                                                                                                                                                  | 66635    | 22422   | 44197        | 18537   | 3.02E-06 | -1.10 | 2.12    | -1.57 |        |  |             |
| 822.5734@12.990248  | RP       | -               | 822.5734  | 12.99 |                                                   |          |                                                                                                                                                  | 219576   | 38344   | 267478       | 50409   | 3.82E-06 | 1.08  | 2.12    | 1.22  |        |  |             |
| 145.1101@3.3068821  | HILIC    | +               | 145.1101  | 3.31  | gamma-butyrobetaine                               | 1        | Hilic (+) 10ev: 146.1173 --> 146.117 (100), 87.0442 (47), 60.0809 (41), 43.0175 (8), 70.0649 (6)                                                 | 350527   | 87343   | 493931       | 208361  | 4.39E-06 | 0.97  | 1.89    | 1.36  |        |  |             |
| 182.0579@2.7312887  | RP       | -               | 182.0579  | 2.73  |                                                   |          |                                                                                                                                                  | 70174    | 28922   | 96540        | 30247   | 4.84E-06 | 0.89  | 1.93    | 1.41  |        |  |             |
| 131.0585@1.5718465  | HILIC    | -               | 131.0585  | 1.57  | b-Guanidinopropionate                             | 2        | Hilic (-) 10ev: 130.0511 --> 88.0409 (100), 130.0503 (31), 116.0212 (28)                                                                         | 57015    | 10798   | 68237        | 13212   | 6.11E-06 | 0.93  | 1.99    | 1.20  |        |  |             |
| 260.0986@5.747193   | HILIC    | -               | 260.0986  | 5.75  |                                                   |          |                                                                                                                                                  | 57267    | 11797   | 69977        | 14310   | 6.99E-06 | 0.97  | 2.13    | 1.22  |        |  |             |
| 524.076@2.3701942   | HILIC    | +               | 524.0760  | 2.37  |                                                   |          |                                                                                                                                                  | 29550    | 13254   | 17192        | 11685   | 7.09E-06 | -0.99 | 1.98    | -1.70 |        |  |             |
| 205.0738@0.71782726 | HILIC    | -               | 205.0738  | 0.72  | Indolelactic acid                                 | 2        | Hilic (-) 10ev: 204.0666 --> 204.0666 (100), 158.0636 (53), 116.0524 (43), 58.1373 (19), 186.0521 (19)                                           | 80418    | 21392   | 104621       | 25444   | 7.83E-06 | 1.03  | 2.27    | 1.31  |        |  |             |
| 991.5735@12.913568  | RP       | -               | 991.5735  | 12.91 |                                                   |          |                                                                                                                                                  | 558044   | 45833   | 508688       | 55262   | 8.44E-06 | -0.98 | 2.07    | -1.10 |        |  |             |
| 158.0437@1.8829517  | HILIC    | -               | 158.0437  | 1.88  |                                                   |          |                                                                                                                                                  | 122831   | 29254   | 160583       | 50210   | 8.67E-06 | 0.95  | 1.95    | 1.29  |        |  |             |
| 183.0528@0.84989387 | HILIC    | -               | 183.0528  | 0.85  | 4-pyridoxic acid                                  | 2        | Hilic (-) 10ev: 182.0455 --> 138.0569 (100), 182.0453 (80), 108.0451 (50), 108.3154 (15)                                                         | 147825   | 118474  | 73118        | 52861   | 1.01E-05 | -0.87 | 1.70    | -2.00 |        |  |             |
| 205.074@4.5351343   | RP       | +               | 205.0740  | 4.54  |                                                   |          |                                                                                                                                                  | 147899   | 41180   | 190284       | 44158   | 1.10E-05 | 0.99  | 2.22    | 1.31  |        |  |             |
| 506.2335@8.663646   | RP       | -               | 506.2335  | 8.66  |                                                   |          |                                                                                                                                                  | 433042   | 358622  | 262981       | 136275  | 1.12E-05 | -0.69 | 1.34    | -1.64 |        |  |             |
| 1561.1267@12.334761 | RP       | -               | 1561.1267 | 12.33 |                                                   |          |                                                                                                                                                  | 355004   | 74607   | 483877       | 165678  | 1.35E-05 | 1.07  | 2.13    | 1.32  |        |  |             |
| 321.0804@1.1603175  | HILIC    | -               | 321.0804  | 1.16  |                                                   |          |                                                                                                                                                  | 18406    | 3783    | 23084        | 5521    | 1.38E-05 | 1.01  | 2.11    | 1.24  |        |  |             |
| 145.0741@0.767923   | HILIC    | -               | 145.0741  | 0.77  | 4-acetamidobutanoate                              | 2        | Hilic (-) 10ev: 144.0670 --> 100.0755 (100), 144.0658 (59), 102.0563 (38)                                                                        | 27105    | 7570    | 38724        | 18256   | 1.53E-05 | 0.90  | 1.87    | 1.36  |        |  |             |
| 803.568@12.334366   | RP       | -               | 803.5680  | 12.33 | PC(18:1/16:1) [M+FA], PC 34:2                     | 2        | RP (-) 40ev: 281.2469 (100), 253.2193 (82)                                                                                                       | 11662142 | 1256335 | 13468494     | 2313587 | 1.62E-05 | 1.01  | 2.07    | 1.14  |        |  |             |
| 187.0457@5.747492   | HILIC    | -               | 187.0457  | 5.75  |                                                   |          |                                                                                                                                                  | 67216    | 9474    | 76504        | 10164   | 1.85E-05 | 0.95  | 2.14    | 1.14  |        |  |             |
| 119.0583@5.746241   | HILIC    | -               | 119.0583  | 5.75  | Threonine                                         | 1        | Hilic (-) 10ev: 118.0512 --> 74.0255 (100), 118.053 (16)                                                                                         | 276105   | 77703   | 366950       | 120604  | 2.00E-05 | 0.92  | 1.98    | 1.31  |        |  |             |
| 565.4467@1.1069216  | HILIC    | +               | 565.4467  | 1.11  |                                                   |          |                                                                                                                                                  | 69288    | 18311   | 57155        | 12274   | 2.02E-05 | -0.79 | 1.61    | -1.23 |        |  |             |
| 173.999@2.3016925   | RP       | -               | 173.9990  | 2.30  |                                                   |          |                                                                                                                                                  | 202365   | 139143  | 419391       | 395306  | 2.08E-05 | 0.81  | 1.72    | 1.88  |        |  |             |
| 336.116@1.5590904   | HILIC    | -               | 336.1160  | 1.56  |                                                   |          |                                                                                                                                                  | 17208    | 7513    | 25022        | 7495    | 2.11E-05 | 1.04  | 2.11    | 1.32  |        |  |             |
| 480.1123@2.374615   | HILIC    | -               | 480.1123  | 2.37  |                                                   |          |                                                                                                                                                  | 90144    | 49722   | 52124        | 37469   | 2.20E-05 | -0.87 | 1.76    | -1.88 |        |  |             |
| 899.5867@12.989594  | RP       | -               | 899.5867  | 12.99 |                                                   |          |                                                                                                                                                  | 1316155  | 199004  | 1558888      | 290251  | 2.92E-05 | 0.99  | 2.02    | 1.18  |        |  |             |
| 1515.1259@12.341703 | RP       | +               | 1515.1259 | 12.34 |                                                   |          |                                                                                                                                                  | 1732514  | 427736  | 2487313      | 1034485 | 3.29E-05 | 1.03  | 2.11    | 1.36  |        |  |             |
| 745.5621@12.750534  | RP       | -               | 745.5621  | 12.75 |                                                   |          |                                                                                                                                                  | 84923    | 10790   | 99413        | 19494   | 3.49E-05 | 0.96  | 2.08    | 1.16  |        |  |             |
| 318.0015@3.4889998  | HILIC    | -               | 318.0015  | 3.49  |                                                   |          |                                                                                                                                                  | 24290    | 4442    | 28560        | 4853    | 3.55E-05 | 0.92  | 1.97    | 1.18  |        |  |             |
| 550.2539@3.3225248  | HILIC    | +               | 550.2539  | 3.32  | Unknown adduct of gamma-butyrobetaine             |          |                                                                                                                                                  | 19125    | 9158    | 30476        | 15122   | 3.64E-05 | 0.93  | 2.10    | 1.55  |        |  |             |
| 130.1104@3.3570101  | HILIC    | +               | 130.1104  | 3.36  | Acetylputrescine                                  | 1        | Hilic (+) 10ev: 131.1176 --> 114.091 (100), 72.0803 (54), 131.1162 (26)                                                                          | 86232    | 28728   | 117788       | 48053   | 3.64E-05 | 0.82  | 1.81    | 1.34  |        |  |             |

| Molecular feature   | HILIC/RP | Ionization mode | Mass      | RT    | Identification                 | ID level | MSMS fragmentation                                                                                   | Control  |         | Preeclampsia |          | t-test   | Cohen's | PLS-DA | fold   |
|---------------------|----------|-----------------|-----------|-------|--------------------------------|----------|------------------------------------------------------------------------------------------------------|----------|---------|--------------|----------|----------|---------|--------|--------|
|                     |          |                 |           |       |                                |          |                                                                                                      | Mean     | SD      | Mean         | SD       | p        | d       | VIP    | change |
| 266.1549@0.953394   | HILIC    | -               | 266.1549  | 0.95  |                                |          |                                                                                                      | 49681    | 13309   | 63979        | 17188    | 3.79E-05 | 0.94    | 1.95   | 1.29   |
| 831.6003@12.987326  | RP       | -               | 831.6003  | 12.99 |                                |          |                                                                                                      | 5428486  | 899547  | 6532175      | 1358939  | 4.00E-05 | 0.98    | 2.02   | 1.19   |
| 743.5449@12.33603   | RP       | -               | 743.5449  | 12.34 |                                |          |                                                                                                      | 82696    | 9642    | 95864        | 18158    | 4.13E-05 | 0.95    | 1.99   | 1.15   |
| 177.0457@1.2458937  | HILIC    | -               | 177.0457  | 1.25  |                                |          |                                                                                                      | 25187    | 5372    | 29567        | 7112     | 4.14E-05 | 0.70    | 1.57   | 1.21   |
| 464.1175@1.1112592  | HILIC    | -               | 464.1175  | 1.11  |                                |          |                                                                                                      | 311529   | 139380  | 195088       | 113375   | 4.48E-05 | -0.92   | 1.84   | -1.75  |
| 161.1052@4.852845   | HILIC    | +               | 161.1052  | 4.85  | L-Carnitine                    | 1        | Hilic (+) 10ev: 162.1119 --> 162.1123 (100), 103.0387 (14), 60.0802 (12), 85.0278 (3)                | 8122873  | 2170320 | 11045709     | 4489046  | 4.73E-05 | 0.88    | 1.77   | 1.32   |
| 769.5469@12.642329  | RP       | -               | 769.5469  | 12.64 |                                |          |                                                                                                      | 42353    | 29354   | 61464        | 36544    | 4.97E-05 | 0.58    | 1.48   | 1.27   |
| 386.1751@5.5915656  | RP       | -               | 386.1751  | 5.59  |                                |          |                                                                                                      | 177012   | 70630   | 123302       | 98728    | 5.80E-05 | -0.63   | 1.35   | -1.69  |
| 178.0297@1.479471   | HILIC    | -               | 178.0297  | 1.48  |                                |          |                                                                                                      | 56392    | 10294   | 67333        | 14214    | 5.94E-05 | 0.89    | 1.98   | 1.19   |
| 402.1702@0.88816506 | HILIC    | -               | 402.1702  | 0.89  |                                |          |                                                                                                      | 102504   | 42904   | 67638        | 36395    | 6.90E-05 | -0.88   | 1.76   | -1.57  |
| 496.3022@2.134485   | HILIC    | -               | 496.3022  | 2.13  |                                |          |                                                                                                      | 47198    | 27026   | 70176        | 28374    | 7.03E-05 | 0.83    | 2.01   | 1.53   |
| 75.0319@5.7464905   | HILIC    | -               | 75.0319   | 5.75  | fragment of Threonine          |          |                                                                                                      | 36500    | 13618   | 50041        | 17291    | 7.04E-05 | 0.88    | 1.92   | 1.30   |
| 101.0835@4.8530583  | HILIC    | +               | 101.0835  | 4.85  | fragment of L-Carnitine        |          |                                                                                                      | 21368    | 4936    | 28149        | 10843    | 7.75E-05 | 0.86    | 1.73   | 1.27   |
| 743.5851@13.106481  | RP       | +               | 743.5851  | 13.11 | Plasmenyl-PC(34:1); PC(P-34:1) | 2        | RP(+) 10ev: 744.5911 --> 744.5892 (100), 184.0728 (15)                                               | 413034   | 153718  | 591165       | 230521   | 7.95E-05 | 0.82    | 1.75   | 1.42   |
| 281.1122@4.401932   | HILIC    | +               | 281.1122  | 4.40  | 1-methyladenosine              | 1        | Hilic (+) 10ev: 282.1199 --> 150.0774 (100), 282.1203 (35), 45.4672 (4)                              | 76609    | 14700   | 92584        | 20665    | 8.80E-05 | 0.90    | 1.87   | 2.20   |
| 591.4629@1.0897286  | HILIC    | +               | 591.4629  | 1.09  |                                |          |                                                                                                      | 108512   | 28401   | 85884        | 21554    | 9.08E-05 | -0.91   | 1.79   | -1.26  |
| 829.584@12.52754    | RP       | -               | 829.5840  | 12.53 |                                |          |                                                                                                      | 12074220 | 1754200 | 13680395     | 1970688  | 9.30E-05 | 0.86    | 1.83   | 1.13   |
| 225.075@1.6694564   | HILIC    | +               | 225.0750  | 1.67  |                                |          |                                                                                                      | 57665    | 23247   | 75012        | 22827    | 0.00010  | 0.75    | 1.73   | 1.34   |
| 785.5937@13.000917  | RP       | +               | 785.5937  | 13.00 | PC(36:2)                       | 2        | RP(+) 10ev: 786.6 --> 786.6012 (100), 184.0743 (15)                                                  | 13926389 | 3090343 | 17356082     | 4344228  | 0.00010  | 0.92    | 1.98   | 1.24   |
| 102.0319@4.8538547  | HILIC    | +               | 102.0319  | 4.85  | fragment of L-Carnitine        |          |                                                                                                      | 38454    | 9997    | 50865        | 19856    | 0.00011  | 0.83    | 1.71   | 1.29   |
| 450.1381@1.3135197  | HILIC    | -               | 450.1381  | 1.31  |                                |          |                                                                                                      | 659764   | 171221  | 505954       | 239646   | 0.00011  | -0.75   | 1.58   | -1.43  |
| 231.1467@1.5653496  | HILIC    | +               | 231.1467  | 1.57  | Butyrylcarnitine               | 1        | Hilic (+) 10ev: 232.1542 --> 232.1542 (100), 85.0283 (63), 173.0814 (21), 60.0789 (16), 144.1018 (7) | 288894   | 117728  | 459566       | 303568   | 0.00012  | 0.81    | 1.72   | 1.48   |
| 384.1606@6.0700865  | RP       | -               | 384.1606  | 6.07  |                                |          |                                                                                                      | 169114   | 76119   | 109916       | 62081    | 0.00012  | -0.86   | 1.72   | -1.65  |
| 195.1104@1.4662216  | HILIC    | -               | 195.1104  | 1.47  |                                |          |                                                                                                      | 84519    | 22385   | 121685       | 72651    | 0.00012  | 0.78    | 1.52   | 1.35   |
| 432.216@0.9517113   | HILIC    | -               | 432.2160  | 0.95  |                                |          |                                                                                                      | 128220   | 41278   | 166383       | 47393    | 0.00013  | 0.86    | 2.08   | 1.33   |
| 757.5629@12.343165  | RP       | +               | 757.5629  | 12.34 | PC(18:1/16:1), PC(34:2)        | 2        | RP(+) 10ev: 758.5704 --> 758.5688 (100), 184.0735 (15)                                               | 38555056 | 5331233 | 44895722     | 9017731  | 0.00013  | 0.88    | 1.95   | 1.15   |
| 285.1941@4.9741244  | RP       | +               | 285.1941  | 4.97  | Octenoylcarnitine              | 3        | 20ev: 286.2014 --> 85.0285 (100), 60.0807 (9), 144.1012 (7), 57.0336 (6)                             | 97790    | 47363   | 139581       | 68457    | 0.00013  | 0.72    | 1.56   | 1.43   |
| 510.1592@3.2422845  | HILIC    | -               | 510.1592  | 3.24  |                                |          |                                                                                                      | 78675    | 51151   | 47746        | 32465    | 0.00014  | -0.74   | 1.52   | -1.76  |
| 873.5713@12.740996  | RP       | -               | 873.5713  | 12.74 |                                |          |                                                                                                      | 2085018  | 221514  | 2301600      | 287135   | 0.00015  | 0.85    | 1.91   | 1.10   |
| 285.1943@0.94856346 | HILIC    | +               | 285.1943  | 0.95  |                                |          |                                                                                                      | 277063   | 132217  | 381663       | 167103   | 0.00015  | 0.70    | 1.49   | 1.38   |
| 416.3293@10.149903  | RP       | +               | 416.3293  | 10.15 |                                |          |                                                                                                      | 75003    | 36940   | 138778       | 102970   | 0.00016  | 0.91    | 1.75   | 1.62   |
| 805.5842@12.755218  | RP       | -               | 805.5842  | 12.76 | PC(16:0/18:1) [M+FA], PC 34:1  | 2        | RP (-) 20ev: 804.577 --> 744.555 (100), 804.5764 (30), 281.2487 (27), 255.2333 (5)                   | 11370762 | 1470663 | 13025363     | 2348092  | 0.00016  | 0.87    | 1.97   | 1.14   |
| 779.5672@12.644232  | RP       | -               | 779.5672  | 12.64 | PC(16:0/16:0) [M+FA], PC 32:0  | 2        | RP (-) 20ev: 778.5606 --> 718.5397 (100), 778.5605 (40), 255.2282 (17)                               | 471630   | 116628  | 651965       | 257154   | 0.00017  | 0.96    | 2.09   | 1.31   |
| 1565.1606@12.752208 | RP       | -               | 1565.1606 | 12.75 |                                |          |                                                                                                      | 267392   | 67881   | 355092       | 127825   | 0.00019  | 0.90    | 2.00   | 1.29   |
| 203.1157@3.121567   | HILIC    | +               | 203.1157  | 3.12  |                                |          |                                                                                                      | 29401    | 17957   | 41628        | 24765    | 0.00022  | 0.57    | 1.30   | 1.58   |
| 85.0528@0.77546597  | HILIC    | +               | 85.0528   | 0.78  |                                |          |                                                                                                      | 22610    | 6407    | 28816        | 9918     | 0.00022  | 0.76    | 1.67   | 1.26   |
| 89.0475@5.5390854   | HILIC    | -               | 89.0475   | 5.54  |                                |          |                                                                                                      | 26025    | 6485    | 34524        | 13996    | 0.00022  | 0.83    | 1.71   | 1.27   |
| 717.5315@11.999971  | RP       | +               | 717.5315  | 12.00 |                                |          |                                                                                                      | 85813    | 58913   | 125206       | 85961    | 0.00023  | 0.54    | 1.53   | 1.34   |
| 119.0584@5.765933   | HILIC    | +               | 119.0584  | 5.77  | Aminohydroxybutyric acid       | 2        | Hilic (+) 10ev: 120.0655 --> 74.0599 (100), 56.0493 (86), 102.0543 (32), 20.065(13), 84.0446 (11)    | 922498   | 266109  | 1185177      | 361973   | 0.00023  | 0.84    | 1.85   | 1.28   |
| 430.2364@9.68475    | RP       | -               | 430.2364  | 9.68  |                                |          |                                                                                                      | 77417    | 25876   | 52650        | 25835    | 0.00024  | -0.96   | 2.08   | -1.34  |
| 284.1203@5.53872    | HILIC    | -               | 284.1203  | 5.54  |                                |          |                                                                                                      | 23348    | 9255    | 34946        | 19317    | 0.00024  | 0.81    | 1.70   | 1.42   |
| 206.1991@1.4785776  | HILIC    | +               | 206.1991  | 1.48  |                                |          |                                                                                                      | 29931    | 17646   | 80923        | 145931   | 0.00026  | 0.62    | 1.12   | 1.80   |
| 228.1472@4.1124287  | HILIC    | +               | 228.1472  | 4.11  |                                |          |                                                                                                      | 136160   | 85344   | 267703       | 323707   | 0.00027  | 0.64    | 1.31   | 1.57   |
| 259.9859@5.7485585  | HILIC    | -               | 259.9859  | 5.75  |                                |          |                                                                                                      | 30256    | 7460    | 36914        | 9295     | 0.00029  | 0.79    | 1.80   | 1.22   |
| 288.0395@1.235573   | HILIC    | +               | 288.0395  | 1.24  | Unknown adduct of creatinine   |          |                                                                                                      | 130993   | 13874   | 141623       | 12704    | 0.00030  | 0.80    | 1.81   | 1.08   |
| 537.3792@1.1531796  | HILIC    | +               | 537.3792  | 1.15  |                                |          |                                                                                                      | 61354    | 31423   | 41475        | 28977    | 0.00030  | -0.66   | 1.39   | -1.45  |
| 959.4498@1.1257075  | HILIC    | -               | 959.4498  | 1.13  |                                |          |                                                                                                      | 102781   | 40732   | 65837        | 40049    | 0.00031  | -0.91   | 1.89   | -1.53  |
| 967.5719@12.994427  | RP       | -               | 967.5719  | 12.99 |                                |          |                                                                                                      | 371398   | 120717  | 458736       | 153325   | 0.00031  | 0.64    | 1.37   | 1.21   |
| 783.5791@12.538605  | RP       | +               | 783.5791  | 12.54 |                                |          |                                                                                                      | 44239006 | 8530708 | 51643467     | 10156547 | 0.00031  | 0.79    | 1.79   | 1.17   |
| 90.0319@1.4661254   | HILIC    | -               | 90.0319   | 1.47  |                                |          |                                                                                                      | 459420   | 111589  | 593612       | 250776   | 0.00033  | 0.74    | 1.53   | 1.25   |
| 153.051@5.5389123   | HILIC    | -               | 153.0510  | 5.54  |                                |          |                                                                                                      | 74532    | 11622   | 85238        | 15612    | 0.00035  | 0.79    | 1.69   | 1.14   |
| 131.0695@5.560988   | HILIC    | +               | 131.0695  | 5.56  | Creatine                       | 1        | Hilic (+) 10ev: 132.0715 --> 90.0546 (100), 132.0765 (81), 44.0491 (44), 86.0596 (17), 132.0665 (9)  | 3855742  | 849800  | 4760167      | 1463396  | 0.00037  | 0.78    | 1.66   | 1.21   |
| 166.0629@0.70108867 | HILIC    | -               | 166.0629  | 0.70  |                                |          |                                                                                                      | 22761    | 15155   | 35410        | 18830    | 0.00037  | 0.74    | 1.60   | 1.32   |
| 166.0476@6.103942   | HILIC    | -               | 166.0476  | 6.10  |                                |          |                                                                                                      | 43333    | 17041   | 56136        | 22291    | 0.00038  | 0.65    | 1.54   | 1.36   |
| 795.5566@12.741263  | RP       | -               | 795.5566  | 12.74 |                                |          |                                                                                                      | 864839   | 81791   | 938472       | 105661   | 0.00040  | 0.79    | 1.89   | 1.08   |
| 239.1367@1.4664137  | HILIC    | -               | 239.1367  | 1.47  |                                |          |                                                                                                      | 115504   | 34498   | 161191       | 93990    | 0.00041  | 0.71    | 1.43   | 1.33   |
| 983.45@1.1137738    | HILIC    | -               | 983.4500  | 1.11  |                                |          |                                                                                                      | 84717    | 36244   | 54138        | 31302    | 0.00042  | -0.91   | 1.79   | -1.38  |
| 450.1379@1.0361383  | HILIC    | -               | 450.1379  | 1.04  |                                |          |                                                                                                      | 27358    | 13526   | 17153        | 13005    | 0.00042  | -0.77   | 1.61   | -1.52  |
| 177.0166@5.747683   | HILIC    | -               | 177.0166  | 5.75  |                                |          |                                                                                                      | 52805    | 6679    | 58609        | 8522     | 0.00044  | 0.76    | 1.80   | 1.11   |
| 264.9736@4.404616   | RP       | +               | 264.9736  | 4.40  |                                |          |                                                                                                      | 65073    | 17032   | 52692        | 14127    | 0.00044  | -0.79   | 1.63   | -1.23  |

| Molecular feature   | HILIC/RP | Ionization mode | Mass      | RT    | Identification               | ID level | MSMS fragmentation                                                                     | Control  |         | Preeclampsia |          | t-test<br>p | Cohen's<br>d | PLS-DA<br>VIP | fold<br>change |
|---------------------|----------|-----------------|-----------|-------|------------------------------|----------|----------------------------------------------------------------------------------------|----------|---------|--------------|----------|-------------|--------------|---------------|----------------|
|                     |          |                 |           |       |                              |          |                                                                                        | Mean     | SD      | Mean         | SD       |             |              |               |                |
| 131.0693@5.5388265  | HILIC    | -               | 131.0693  | 5.54  | Creatine                     | 1        | Hilic (-) 10ev: 130.0618 --> 88.0398 (100)                                             | 39374    | 12476   | 54509        | 27341    | 0.00045     | 0.76         | 1.63          | 1.32           |
| 188.1522@6.758182   | HILIC    | +               | 188.1522  | 6.76  | Trimethyllysine              | 1        | Hilic (+) 10ev: 189.1595 --> 189.1582 (100), 130.0877 (42), 84.0809 (40), 60.0808 (23) | 117516   | 38938   | 146709       | 44830    | 0.00045     | 0.70         | 1.60          | 1.25           |
| 759.578@12.764939   | RP       | +               | 759.5780  | 12.76 | PC(16:0/18:1), PC(34:1)      | 2        | RP(+) 10ev: 760.5855 --> 760.5833 (100), 184.0734 (15)                                 | 33449490 | 5259530 | 39161086     | 8790871  | 0.00045     | 0.81         | 1.91          | 1.16           |
| 555.3528@10.409204  | RP       | -               | 555.3528  | 10.41 |                              |          |                                                                                        | 113884   | 38154   | 92555        | 32174    | 0.00047     | -0.61        | 1.30          | -1.25          |
| 701.3104@10.11647   | RP       | -               | 701.3104  | 10.12 |                              |          |                                                                                        | 49859    | 7694    | 55603        | 6930     | 0.00047     | 0.79         | 1.73          | 1.12           |
| 743.5463@12.103155  | RP       | +               | 743.5463  | 12.10 |                              |          |                                                                                        | 344252   | 69973   | 456136       | 211227   | 0.00047     | 0.80         | 1.78          | 1.25           |
| 97.9676@7.7432446   | HILIC    | -               | 97.9676   | 7.74  | Sulfuric acid                | 2        | Hilic (-) 20ev: 96.9600 --> 96.9600 (100), 79.9579 (82)                                | 925437   | 140826  | 1041549      | 178657   | 0.00048     | 0.73         | 1.51          | 1.12           |
| 869.5707@12.7919    | RP       | -               | 869.5707  | 12.79 |                              |          |                                                                                        | 231209   | 62796   | 170921       | 80401    | 0.00049     | -0.84        | 1.77          | -1.30          |
| 159.1258@2.0653882  | HILIC    | +               | 159.1258  | 2.07  | 5-AVAB                       | 1        | Hilic (+) 10ev: 160.1335 --> 160.1333 (100), 101.0602 (18), 60.0807 (14), 55.0536 (3)  | 669078   | 236375  | 956325       | 508650   | 0.00049     | 0.77         | 1.60          | 1.43           |
| 103.0999@1.4785815  | HILIC    | +               | 103.0999  | 1.48  | Choline                      | 2        | Hilic (+) 10ev: 104.1071 --> 104.1071 (100), 60.0809 (21), 45.0336 (6), 58.0653 (2)    | 29777821 | 6104113 | 36291027     | 10781073 | 0.00051     | 0.77         | 1.62          | 1.20           |
| 432.3241@9.673707   | RP       | -               | 432.3241  | 9.67  |                              |          |                                                                                        | 255309   | 73637   | 197170       | 68253    | 0.00052     | -0.82        | 1.69          | -1.33          |
| 368.1664@7.405428   | RP       | -               | 368.1664  | 7.41  | Unknown steroid              | 3        | RP (-) 20ev: 367.1602 (100), 96.9592 (45)                                              | 2622852  | 883580  | 1943962      | 923171   | 0.00057     | -0.75        | 1.60          | -1.48          |
| 257.1627@1.1977626  | HILIC    | +               | 257.1627  | 1.20  |                              |          |                                                                                        | 20878    | 13622   | 30609        | 15489    | 0.00058     | 0.67         | 1.48          | 1.49           |
| 261.1576@3.4491658  | HILIC    | +               | 261.1576  | 3.45  |                              |          |                                                                                        | 29082    | 11003   | 40828        | 21223    | 0.00058     | 0.73         | 1.54          | 1.35           |
| 733.562@12.655955   | RP       | +               | 733.5620  | 12.66 | PC(16:0/16:0), PC(32:0)      | 2        | RP(+) 10ev: 734.5709 --> 734.5717 (100), 184.074 (15)                                  | 1243080  | 387675  | 1808758      | 841770   | 0.00058     | 0.92         | 2.05          | 1.37           |
| 101.0474@5.7659316  | HILIC    | +               | 101.0474  | 5.77  |                              |          |                                                                                        | 98304    | 30877   | 124446       | 42545    | 0.00058     | 0.71         | 1.59          | 1.26           |
| 193.1309@1.4671832  | HILIC    | -               | 193.1309  | 1.47  |                              |          |                                                                                        | 200728   | 56357   | 265500       | 123697   | 0.00059     | 0.72         | 1.49          | 1.28           |
| 468.2366@1.3524104  | HILIC    | -               | 468.2366  | 1.35  |                              |          |                                                                                        | 39594    | 18914   | 29456        | 13750    | 0.00060     | -0.62        | 1.35          | -1.40          |
| 414.3134@9.678997   | RP       | +               | 414.3134  | 9.68  |                              |          |                                                                                        | 135821   | 40137   | 104481       | 37706    | 0.00060     | -0.81        | 1.67          | -1.34          |
| 907.5898@12.801803  | RP       | -               | 907.5898  | 12.80 |                              |          |                                                                                        | 137356   | 49205   | 164387       | 61371    | 0.00060     | 0.49         | 1.09          | 1.19           |
| 464.1167@1.342742   | HILIC    | -               | 464.1167  | 1.34  |                              |          |                                                                                        | 44401    | 19978   | 29437        | 19467    | 0.00065     | -0.76        | 1.63          | -1.46          |
| 635.3408@1.2119424  | HILIC    | -               | 635.3408  | 1.21  |                              |          |                                                                                        | 55828    | 6595    | 60802        | 7442     | 0.00067     | 0.71         | 1.56          | 1.09           |
| 957.5443@12.997534  | RP       | -               | 957.5443  | 13.00 |                              |          |                                                                                        | 131812   | 34346   | 158154       | 38730    | 0.00069     | 0.72         | 1.56          | 1.20           |
| 1068.6176@10.100798 | RP       | -               | 1068.6176 | 10.10 |                              |          |                                                                                        | 132273   | 33822   | 108357       | 30856    | 0.00070     | -0.74        | 1.61          | -1.23          |
| 877.5756@13.618411  | RP       | +               | 877.5756  | 13.62 |                              |          |                                                                                        | 59886    | 37578   | 94300        | 38892    | 0.00071     | 0.90         | 1.85          | 1.38           |
| 731.5472@12.202503  | RP       | +               | 731.5472  | 12.20 | PC(32:1)                     | 2        | RP(+) 10ev: 732.555 --> 732.5525 (100), 184.073 (15)                                   | 4932763  | 1336518 | 6678008      | 2869699  | 0.00074     | 0.83         | 1.89          | 1.29           |
| 285.0963@1.3852043  | HILIC    | +               | 285.0963  | 1.39  |                              |          |                                                                                        | 24734    | 10099   | 30096        | 8838     | 0.00076     | 0.57         | 1.32          | 1.25           |
| 202.1317@4.681564   | HILIC    | +               | 202.1317  | 4.68  |                              |          |                                                                                        | 146704   | 63072   | 211812       | 126258   | 0.00077     | 0.69         | 1.54          | 1.36           |
| 947.5854@12.792761  | RP       | -               | 947.5854  | 12.79 |                              |          |                                                                                        | 695238   | 183043  | 566766       | 193091   | 0.00078     | -0.68        | 1.67          | -1.26          |
| 823.5415@13.000701  | RP       | +               | 823.5415  | 13.00 |                              |          |                                                                                        | 179790   | 80682   | 225027       | 88020    | 0.00080     | 0.54         | 1.25          | 1.27           |
| 710.5132@11.6102085 | RP       | -               | 710.5132  | 11.61 |                              |          |                                                                                        | 74296    | 11026   | 84358        | 15397    | 0.00085     | 0.76         | 1.70          | 1.13           |
| 402.1711@6.1199713  | RP       | -               | 402.1711  | 6.12  |                              |          |                                                                                        | 123339   | 49374   | 92386        | 46773    | 0.00089     | -0.64        | 1.35          | -1.44          |
| 275.1734@2.3287966  | HILIC    | +               | 275.1734  | 2.33  |                              |          |                                                                                        | 34498    | 24264   | 50193        | 31191    | 0.00089     | 0.57         | 1.33          | 1.46           |
| 899.5608@12.9377    | RP       | +               | 899.5608  | 12.94 |                              |          |                                                                                        | 427634   | 69367   | 408155       | 41631    | 0.00091     | -0.35        | 0.89          | -1.07          |
| 532.2649@4.1423697  | HILIC    | +               | 532.2649  | 4.14  |                              |          |                                                                                        | 34440    | 17911   | 49650        | 22452    | 0.00093     | 0.75         | 1.84          | 1.45           |
| 763.5478@0.9037337  | HILIC    | -               | 763.5478  | 0.90  |                              |          |                                                                                        | 390516   | 108690  | 443302       | 125987   | 0.00100     | 0.45         | 1.11          | 1.12           |
| 140.0586@5.288093   | HILIC    | +               | 140.0586  | 5.29  |                              |          |                                                                                        | 26395    | 22627   | 52022        | 47256    | 0.00111     | 0.73         | 1.69          | 1.71           |
| 141.0791@1.3203065  | HILIC    | +               | 141.0791  | 1.32  |                              |          |                                                                                        | 39427    | 43485   | 71462        | 66137    | 0.00113     | 0.58         | 1.42          | 1.84           |
| 297.1073@1.9449425  | HILIC    | +               | 297.1073  | 1.94  |                              |          |                                                                                        | 55838    | 12804   | 68021        | 19692    | 0.00113     | 0.75         | 1.65          | 1.20           |
| 751.5377@12.092802  | RP       | -               | 751.5377  | 12.09 | PC(14:0/16:0) [M+FA], PC30:0 | 2        | RP (-) 20ev: 750.5303 --> 690.5098 (52), 227.2052 (22), 255.2324 (20)                  | 283870   | 60928   | 365203       | 134372   | 0.00115     | 0.83         | 2.01          | 1.23           |
| 582.3289@1.218067   | HILIC    | -               | 582.3289  | 1.22  |                              |          |                                                                                        | 162469   | 16843   | 175694       | 18448    | 0.00117     | 0.75         | 1.60          | 1.08           |
| 174.1367@6.6708083  | HILIC    | +               | 174.1367  | 6.67  |                              |          |                                                                                        | 45091    | 20320   | 63953        | 33816    | 0.00118     | 0.70         | 1.50          | 1.41           |
| 614.4884@13.653746  | RP       | +               | 614.4884  | 13.65 |                              |          |                                                                                        | 126784   | 56717   | 177222       | 97825    | 0.00120     | 0.65         | 1.44          | 1.36           |
| 494.1649@1.5609603  | HILIC    | -               | 494.1649  | 1.56  |                              |          |                                                                                        | 357057   | 197552  | 239130       | 139436   | 0.00124     | -0.70        | 1.48          | -1.61          |
| 508.2674@4.252737   | HILIC    | +               | 508.2674  | 4.25  |                              |          |                                                                                        | 19443    | 13174   | 35267        | 23536    | 0.00125     | 0.86         | 1.78          | 1.54           |
| 203.1158@2.9447     | HILIC    | +               | 203.1158  | 2.94  | Acetylcarnitine              | 2        | Hilic (+) 10ev: 204.1229 --> 204.1232 (100), 85.0285 (74), 145.05 (24), 60.0806 (18)   | 7074347  | 2864503 | 10152900     | 6004609  | 0.00128     | 0.69         | 1.53          | 1.36           |
| 796.5752@12.361108  | RP       | +               | 796.5752  | 12.36 |                              |          |                                                                                        | 100175   | 35541   | 74488        | 41833    | 0.00130     | -0.66        | 1.62          | -1.19          |
| 59.0733@1.4788655   | HILIC    | +               | 59.0733   | 1.48  |                              |          |                                                                                        | 31581    | 13026   | 42400        | 16600    | 0.00130     | 0.73         | 1.61          | 1.23           |
| 717.5664@12.956753  | RP       | +               | 717.5664  | 12.96 |                              |          |                                                                                        | 112513   | 28242   | 151615       | 66875    | 0.00132     | 0.82         | 1.86          | 1.27           |
| 803.5343@12.292024  | RP       | +               | 803.5343  | 12.29 |                              |          |                                                                                        | 3937894  | 576612  | 3556765      | 625699   | 0.00133     | -0.63        | 1.53          | -1.11          |
| 788.531@11.610996   | RP       | -               | 788.5310  | 11.61 |                              |          |                                                                                        | 141351   | 20771   | 161463       | 33370    | 0.00135     | 0.74         | 1.65          | 1.13           |
| 720.5418@11.609544  | RP       | -               | 720.5418  | 11.61 |                              |          |                                                                                        | 525374   | 76535   | 595918       | 116177   | 0.00137     | 0.73         | 1.64          | 1.12           |
| 144.0422@2.943805   | HILIC    | +               | 144.0422  | 2.94  |                              |          |                                                                                        | 29347    | 11054   | 40866        | 22203    | 0.00141     | 0.69         | 1.53          | 1.33           |
| 145.0737@0.7920776  | HILIC    | +               | 145.0737  | 0.79  |                              |          |                                                                                        | 97743    | 38684   | 149128       | 101057   | 0.00142     | 0.74         | 1.64          | 1.38           |
| 181.05@3.5151331    | HILIC    | +               | 181.0500  | 3.52  |                              |          |                                                                                        | 91614    | 78915   | 147705       | 107770   | 0.00146     | 0.60         | 1.30          | 1.87           |
| 845.5394@12.216898  | RP       | -               | 845.5394  | 12.22 |                              |          |                                                                                        | 198564   | 74454   | 263009       | 106474   | 0.00150     | 0.71         | 1.57          | 1.32           |
| 1583.1132@12.185694 | RP       | -               | 1583.1132 | 12.19 |                              |          |                                                                                        | 131864   | 29738   | 163631       | 54984    | 0.00151     | 0.75         | 1.75          | 1.21           |
| 255.0331@5.7502604  | HILIC    | -               | 255.0331  | 5.75  |                              |          |                                                                                        | 22426    | 3088    | 24414        | 2910     | 0.00156     | 0.66         | 1.63          | 1.09           |
| 150.1363@1.4995939  | HILIC    | +               | 150.1363  | 1.50  |                              |          |                                                                                        | 121244   | 210079  | 348711       | 985376   | 0.00160     | 0.38         | 0.88          | 2.12           |
| 777.5527@12.18503   | RP       | -               | 777.5527  | 12.19 |                              |          |                                                                                        | 1688483  | 448144  | 2265955      | 966542   | 0.00160     | 0.82         | 1.83          | 1.27           |
| 1549.1407@12.517332 | RP       | +               | 1549.1407 | 12.52 |                              |          |                                                                                        | 149531   | 44575   | 189436       | 77659    | 0.00166     | 0.65         | 1.57          | 1.27           |
| 705.5313@12.10256   | RP       | +               | 705.5313  | 12.10 | PC(30:0)                     | 2        | RP(+) 10ev: 706.539 --> 706.5373 (100), 184.0732 (20)                                  | 729437   | 195475  | 995341       | 449697   | 0.00167     | 0.82         | 2.01          | 1.28           |
| 283.1628@1.4662933  | HILIC    | -               | 283.1628  | 1.47  |                              |          |                                                                                        | 209958   | 109341  | 344592       | 247834   | 0.00170     | 0.75         | 1.53          | 1.39           |

| Molecular feature    | HILIC/RP | Ionization mode | Mass      | RT    | Identification                      | ID level | MSMS fragmentation                                                                                                                            | Control |         | Preeclampsia |         | t-test<br>p | Cohen's<br>d | PLS-DA<br>VIP | fold<br>change |
|----------------------|----------|-----------------|-----------|-------|-------------------------------------|----------|-----------------------------------------------------------------------------------------------------------------------------------------------|---------|---------|--------------|---------|-------------|--------------|---------------|----------------|
|                      |          |                 |           |       |                                     |          |                                                                                                                                               | Mean    | SD      | Mean         | SD      |             |              |               |                |
| 169.0851@6.8600483   | HILIC    | +               | 169.0851  | 6.86  |                                     |          |                                                                                                                                               | 406033  | 384116  | 678822       | 573330  | 0.00178     | 0.57         | 1.42          | 1.84           |
| 993.4709@1.1858466   | HILIC    | -               | 993.4709  | 1.19  |                                     |          |                                                                                                                                               | 63640   | 36604   | 37223        | 31380   | 0.00183     | -0.78        | 1.63          | -1.47          |
| 811.4833@12.344175   | RP       | +               | 811.4833  | 12.34 |                                     |          |                                                                                                                                               | 74289   | 10047   | 83282        | 14402   | 0.00188     | 0.74         | 1.61          | 1.11           |
| 674.5364@11.624317   | RP       | +               | 674.5364  | 11.62 | SM(32:1)                            | 2        | RP(+) 10ev: 675.5443 --> 675.5428 (100), 184.0736 (68)                                                                                        | 865499  | 148563  | 999767       | 229291  | 0.00188     | 0.71         | 1.64          | 1.14           |
| 259.1787@1.0541074   | HILIC    | +               | 259.1787  | 1.05  | Hexanoylecarnitine                  | 1        | Hilic (+) 10ev: 260.1853 --> 85.0285 (100), 260.1853 (91), 201.1126 (16), 60.0806 (13), 99.0784 (7)                                           | 159899  | 75167   | 243850       | 153408  | 0.00189     | 0.73         | 1.59          | 1.42           |
| 512.3094@0.9817533   | HILIC    | -               | 512.3094  | 0.98  |                                     |          |                                                                                                                                               | 29602   | 19999   | 48764        | 42192   | 0.00191     | 0.62         | 1.31          | 1.54           |
| 926.5379@1.1207309   | HILIC    | -               | 926.5379  | 1.12  |                                     |          |                                                                                                                                               | 50019   | 16342   | 60133        | 15504   | 0.00196     | 0.64         | 1.45          | 1.22           |
| 416.2241@7.8087955   | RP       | -               | 416.2241  | 7.81  |                                     |          |                                                                                                                                               | 1936291 | 1039391 | 2857927      | 1635604 | 0.00200     | 0.69         | 1.51          | 1.47           |
| 510.283@4.1090207    | HILIC    | -               | 510.2830  | 4.11  |                                     |          |                                                                                                                                               | 93291   | 37347   | 118231       | 41174   | 0.00200     | 0.64         | 1.72          | 1.29           |
| 913.5572@12.910612   | RP       | -               | 913.5572  | 12.91 |                                     |          |                                                                                                                                               | 305631  | 56756   | 285677       | 41029   | 0.00203     | -0.41        | 0.97          | -1.09          |
| 364.0982@6.392563    | HILIC    | +               | 364.0982  | 6.39  |                                     |          |                                                                                                                                               | 30829   | 16512   | 46419        | 34356   | 0.00206     | 0.61         | 1.33          | 1.40           |
| 132.0534@6.192008    | HILIC    | -               | 132.0534  | 6.19  | L-Asparagine                        | 1        | Hilic (-) 20ev: 131.0460 --> 41.9980 (100), 70.0284 (53)                                                                                      | 68316   | 14409   | 82134        | 24962   | 0.00208     | 0.70         | 1.47          | 1.18           |
| 185.0815@1.4724611   | HILIC    | -               | 185.0815  | 1.47  |                                     |          |                                                                                                                                               | 21206   | 3757    | 24373        | 5636    | 0.00212     | 0.67         | 1.44          | 1.14           |
| 204.0352@5.747501    | HILIC    | -               | 204.0352  | 5.75  |                                     |          |                                                                                                                                               | 42349   | 6707    | 47416        | 8416    | 0.00218     | 0.67         | 1.70          | 1.12           |
| 791.6037@13.284373   | RP       | -               | 791.6037  | 13.28 |                                     |          |                                                                                                                                               | 182782  | 45270   | 227568       | 67324   | 0.00219     | 0.80         | 1.78          | 1.19           |
| 150.0529@3.6811545   | HILIC    | -               | 150.0529  | 3.68  |                                     |          |                                                                                                                                               | 112319  | 39454   | 143339       | 61683   | 0.00235     | 0.61         | 1.48          | 1.26           |
| 1015.5713@12.805312  | RP       | -               | 1015.5713 | 12.81 |                                     |          |                                                                                                                                               | 143473  | 48227   | 118866       | 50783   | 0.00236     | -0.50        | 1.62          | -1.23          |
| 454.3058@9.679979    | RP       | +               | 454.3058  | 9.68  |                                     |          |                                                                                                                                               | 90898   | 27332   | 70144        | 27909   | 0.00238     | -0.75        | 1.62          | -1.30          |
| 825.5536@11.985963   | RP       | -               | 825.5536  | 11.99 | PC(16:1/20:4) [M+FA], PC 36:5       | 2        | RP (-) 20ev: 824.5458 --> 764.5202 (100), 303.2323 (27), 824.5466 (20)                                                                        | 2944841 | 1037713 | 3802877      | 1540620 | 0.00244     | 0.67         | 1.41          | 1.27           |
| 384.1604@6.2549796   | RP       | -               | 384.1604  | 6.25  |                                     |          |                                                                                                                                               | 9499091 | 3259910 | 7421983      | 3297859 | 0.00247     | -0.63        | 1.45          | -1.37          |
| 555.3109@1.2284697   | HILIC    | -               | 555.3109  | 1.23  |                                     |          |                                                                                                                                               | 166495  | 47022   | 187525       | 38778   | 0.00249     | 0.49         | 1.14          | 1.09           |
| 402.1692@0.90215373  | HILIC    | -               | 402.1692  | 0.90  |                                     |          |                                                                                                                                               | 94370   | 50001   | 65742        | 38200   | 0.00250     | -0.65        | 1.38          | -1.48          |
| 688.5511@11.826177   | RP       | +               | 688.5511  | 11.83 | SM(33:1)                            | 2        | RP(+) 10ev: 689.5598 --> 689.5599 (100), 184.0732 (40)                                                                                        | 275927  | 54248   | 322285       | 81432   | 0.00257     | 0.68         | 1.69          | 1.15           |
| 242.1263@1.8007017   | HILIC    | -               | 242.1263  | 1.80  |                                     |          |                                                                                                                                               | 61564   | 38404   | 81473        | 42645   | 0.00259     | 0.49         | 1.16          | 1.41           |
| 226.2298@10.429677   | RP       | -               | 226.2298  | 10.43 |                                     |          |                                                                                                                                               | 174130  | 57828   | 219821       | 65247   | 0.00266     | 0.74         | 1.59          | 1.17           |
| 384.161@6.4852567    | RP       | -               | 384.1610  | 6.49  |                                     |          |                                                                                                                                               | 238386  | 95136   | 179578       | 99667   | 0.00267     | -0.60        | 1.30          | -1.39          |
| 450.1385@1.1977354   | HILIC    | -               | 450.1385  | 1.20  |                                     |          |                                                                                                                                               | 147701  | 73005   | 103079       | 64369   | 0.00267     | -0.65        | 1.38          | -1.52          |
| 970.5419@13.021991   | RP       | +               | 970.5419  | 13.02 |                                     |          |                                                                                                                                               | 127448  | 33941   | 145474       | 47940   | 0.00275     | 0.44         | 1.16          | 1.14           |
| 436.1527@7.4064493   | RP       | -               | 436.1527  | 7.41  |                                     |          |                                                                                                                                               | 75864   | 21622   | 59853        | 24636   | 0.00275     | -0.69        | 1.53          | -1.29          |
| 609.5327@12.53233    | RP       | -               | 609.5327  | 12.53 |                                     |          |                                                                                                                                               | 204769  | 63913   | 289091       | 153660  | 0.00286     | 0.78         | 1.80          | 1.29           |
| 270.1982@7.3069563   | RP       | +               | 270.1982  | 7.31  |                                     |          |                                                                                                                                               | 74533   | 39383   | 59198        | 33428   | 0.00286     | -0.42        | 1.01          | -1.40          |
| 923.5873@12.894838   | RP       | -               | 923.5873  | 12.89 |                                     |          |                                                                                                                                               | 2212393 | 229263  | 2057130      | 258454  | 0.00296     | -0.64        | 1.45          | -1.08          |
| 272.2353@10.429668   | RP       | -               | 272.2353  | 10.43 |                                     |          |                                                                                                                                               | 166743  | 36987   | 198144       | 59840   | 0.00302     | 0.65         | 1.45          | 1.17           |
| 557.2252@12.561329   | RP       | -               | 557.2252  | 12.56 |                                     |          |                                                                                                                                               | 320049  | 60719   | 284748       | 54176   | 0.00302     | -0.61        | 1.35          | -1.12          |
| 316.2403@8.829803    | RP       | +               | 316.2403  | 8.83  |                                     |          |                                                                                                                                               | 184345  | 115986  | 266431       | 211407  | 0.00306     | 0.50         | 1.24          | 1.43           |
| 723.52@12.5317335    | RP       | -               | 723.5200  | 12.53 | Plasmenyl-PE(36:4): PE(P-16:0/20:4) | 2        | RP(-) 20ev: 722.514 (100), 303.2325 (80), 436.2998 (6), 646.0751 (6)                                                                          | 193620  | 61664   | 274911       | 149734  | 0.00313     | 0.77         | 1.78          | 1.29           |
| 1198.7664@11.9912405 | RP       | +               | 1198.7664 | 11.99 |                                     |          |                                                                                                                                               | 1062403 | 419689  | 804949       | 290879  | 0.00314     | -0.72        | 1.46          | -1.32          |
| 891.5324@12.74091    | RP       | -               | 891.5324  | 12.74 |                                     |          |                                                                                                                                               | 103170  | 12236   | 112019       | 14537   | 0.00315     | 0.66         | 1.56          | 1.08           |
| 1513.112@12.248851   | RP       | +               | 1513.1120 | 12.25 |                                     |          |                                                                                                                                               | 142906  | 35391   | 185982       | 79224   | 0.00319     | 0.75         | 1.85          | 1.24           |
| 457.1689@10.656244   | RP       | -               | 457.1689  | 10.66 |                                     |          |                                                                                                                                               | 145251  | 44779   | 131207       | 43278   | 0.00320     | -0.32        | 0.83          | -1.18          |
| 595.363@1.0939316    | HILIC    | +               | 595.3630  | 1.09  |                                     |          |                                                                                                                                               | 68630   | 17306   | 56494        | 17930   | 0.00320     | -0.69        | 1.63          | -1.19          |
| 613.3387@10.081936   | RP       | -               | 613.3387  | 10.08 | LysoPC(22:6) [M+FA]                 | 2        | RP(-) 20ev: 612.3318 --> 552.3098 (100), 327.2321 (55)                                                                                        | 662513  | 143197  | 570545       | 159375  | 0.00320     | -0.61        | 1.37          | -1.17          |
| 474.4074@12.439606   | RP       | +               | 474.4074  | 12.44 |                                     |          |                                                                                                                                               | 154721  | 20570   | 141698       | 24912   | 0.00324     | -0.57        | 1.45          | -1.10          |
| 180.0455@1.563466    | HILIC    | +               | 180.0455  | 1.56  |                                     |          |                                                                                                                                               | 39747   | 12441   | 47448        | 13152   | 0.00325     | 0.60         | 1.57          | 1.22           |
| 681.3246@10.077852   | RP       | -               | 681.3246  | 10.08 |                                     |          |                                                                                                                                               | 63328   | 10219   | 56614        | 11629   | 0.00325     | -0.61        | 1.38          | -1.13          |
| 819.5272@12.094173   | RP       | -               | 819.5272  | 12.09 |                                     |          |                                                                                                                                               | 61349   | 45400   | 81425        | 58063   | 0.00328     | 0.39         | 1.10          | 1.19           |
| 1537.1082@12.19372   | RP       | +               | 1537.1082 | 12.19 |                                     |          |                                                                                                                                               | 574049  | 148675  | 730467       | 292972  | 0.00331     | 0.71         | 1.73          | 1.23           |
| 175.0635@5.0259047   | RP       | +               | 175.0635  | 5.03  |                                     |          |                                                                                                                                               | 310988  | 94292   | 254553       | 68622   | 0.00332     | -0.69        | 1.57          | -1.21          |
| 755.5468@12.01643    | RP       | +               | 755.5468  | 12.02 | PC(34:3)                            | 2        | RP(+) 10ev: 756.5564 --> 756.5543 (100), 184.0741 (15)                                                                                        | 9087779 | 4915287 | 13229119     | 7554583 | 0.00332     | 0.66         | 1.40          | 1.48           |
| 1537.6108@12.343345  | RP       | +               | 1537.6108 | 12.34 |                                     |          |                                                                                                                                               | 51772   | 8084    | 58815        | 12457   | 0.00336     | 0.69         | 1.53          | 1.12           |
| 160.1207@6.7938137   | HILIC    | +               | 160.1207  | 6.79  |                                     |          |                                                                                                                                               | 42508   | 30496   | 61516        | 42327   | 0.00340     | 0.52         | 1.13          | 1.46           |
| 1541.1387@12.525112  | RP       | +               | 1541.1387 | 12.53 |                                     |          |                                                                                                                                               | 340253  | 106615  | 405620       | 110166  | 0.00348     | 0.60         | 1.54          | 1.21           |
| 813.4974@12.76368    | RP       | +               | 813.4974  | 12.76 |                                     |          |                                                                                                                                               | 75719   | 18815   | 79961        | 30449   | 0.00348     | 0.17         | 0.61          | 1.12           |
| 923.5198@1.120602    | HILIC    | -               | 923.5198  | 1.12  |                                     |          |                                                                                                                                               | 76868   | 22596   | 88331        | 26362   | 0.00357     | 0.47         | 1.25          | 1.19           |
| 241.0717@3.0051851   | HILIC    | +               | 241.0717  | 3.01  |                                     |          |                                                                                                                                               | 24587   | 9984    | 34412        | 20805   | 0.00364     | 0.64         | 1.45          | 1.32           |
| 197.0801@5.6760187   | HILIC    | +               | 197.0801  | 5.68  | N-Acetyl-L-Histidine                | 2        | Hilic (+) 10ev: 198.0873 --> 156.0758 (100), 110.0719 (61), 198.0858 (41), 152.0796 (37), 180.0755 (32), 154.1237 (23), 198.1588 (17)         | 53421   | 18680   | 70228        | 29307   | 0.00368     | 0.70         | 1.53          | 1.27           |
| 494.1644@1.414745    | HILIC    | -               | 494.1644  | 1.41  |                                     |          |                                                                                                                                               | 165019  | 84946   | 116575       | 92392   | 0.00380     | -0.55        | 1.31          | -1.47          |
| 286.1935@6.2059126   | RP       | +               | 286.1935  | 6.21  | MG(13:1): [M+NH4] <sup>+</sup>      | 2        | RP(+) 10ev: 304.2274 --> 269.1892 (100), 287.2018 (84), 251.1789 (40), 227.174 (19), 213.164 (18), 241.1942 (18), 199.1507 (16), 90.0575 (14) | 330551  | 145069  | 250690       | 129620  | 0.00385     | -0.58        | 1.37          | -1.41          |
| 819.593@12.990608    | RP       | -               | 819.5930  | 12.99 |                                     |          |                                                                                                                                               | 289536  | 85462   | 330014       | 102279  | 0.00397     | 0.43         | 1.33          | 1.16           |
| 790.3045@6.2547674   | RP       | -               | 790.3045  | 6.25  |                                     |          |                                                                                                                                               | 193123  | 73114   | 151734       | 84424   | 0.00406     | -0.53        | 1.34          | -1.47          |

| Molecular feature   | HILIC/RP | Ionization mode | Mass      | RT    | Identification                      | ID level | MS/MS fragmentation                                                                                                                                | Control  |         | Preeclampsia |         | t-test  |       | Cohen's d | PLS-DA VIP | fold change |
|---------------------|----------|-----------------|-----------|-------|-------------------------------------|----------|----------------------------------------------------------------------------------------------------------------------------------------------------|----------|---------|--------------|---------|---------|-------|-----------|------------|-------------|
|                     |          |                 |           |       |                                     |          |                                                                                                                                                    | Mean     | SD      | Mean         | SD      | p       |       |           |            |             |
| 525.2863@10.108381  | RP       | +               | 525.2863  | 10.11 | LysoPE 22:6                         | 2        | RP (+) 20ev: 526.2936 --> 44.0486 (100), 385.2730 (63), 62.0592 (48)                                                                               | 1051779  | 246212  | 908684       | 226579  | 0.00412 | -0.61 | 1.38      | -1.16      |             |
| 810.6609@13.676495  | RP       | +               | 810.6609  | 13.68 |                                     |          |                                                                                                                                                    | 850683   | 185486  | 1023760      | 306637  | 0.00414 | 0.70  | 1.56      | 1.18       |             |
| 567.3331@1.1438832  | HILIC    | +               | 567.3331  | 1.14  |                                     |          |                                                                                                                                                    | 2572020  | 709351  | 2105632      | 669974  | 0.00422 | -0.68 | 1.50      | -1.22      |             |
| 387.299@0.90089715  | HILIC    | +               | 387.2990  | 0.90  |                                     |          |                                                                                                                                                    | 28624    | 11765   | 36090        | 14470   | 0.00427 | 0.57  | 1.36      | 1.25       |             |
| 73.0527@5.7660303   | HILIC    | +               | 73.0527   | 5.77  |                                     |          |                                                                                                                                                    | 81564    | 29521   | 102253       | 35672   | 0.00431 | 0.63  | 1.50      | 1.25       |             |
| 145.0739@0.78296113 | HILIC    | +               | 145.0739  | 0.78  |                                     |          |                                                                                                                                                    | 98839    | 38232   | 147259       | 107862  | 0.00441 | 0.66  | 1.39      | 1.32       |             |
| 201.1477@3.517562   | HILIC    | +               | 201.1477  | 3.52  |                                     |          |                                                                                                                                                    | 74344    | 62965   | 114851       | 70756   | 0.00445 | 0.61  | 1.29      | 1.75       |             |
| 364.0981@6.453968   | HILIC    | +               | 364.0981  | 6.45  |                                     |          |                                                                                                                                                    | 37955    | 23262   | 56051        | 36524   | 0.00462 | 0.61  | 1.38      | 1.41       |             |
| 380.0196@4.731895   | HILIC    | -               | 380.0196  | 4.73  |                                     |          |                                                                                                                                                    | 66456    | 7721    | 59749        | 14108   | 0.00463 | -0.61 | 1.75      | -1.15      |             |
| 399.3347@9.199599   | RP       | +               | 399.3347  | 9.20  | Acylcarnitine 16:0                  | 2        | RP (+) 20ev: 400.3428 --> 85.0293 (100), 400.3425 (48)                                                                                             | 396670   | 143073  | 497978       | 213441  | 0.00472 | 0.57  | 1.35      | 1.25       |             |
| 1604.0925@12.757357 | RP       | +               | 1604.0925 | 12.76 |                                     |          |                                                                                                                                                    | 76212    | 22441   | 89246        | 33157   | 0.00492 | 0.47  | 1.08      | 1.20       |             |
| 416.224@7.8029394   | RP       | -               | 416.2240  | 7.80  |                                     |          |                                                                                                                                                    | 1879864  | 901434  | 2763124      | 1699603 | 0.00495 | 0.68  | 1.64      | 1.39       |             |
| 982.508@12.569582   | RP       | +               | 982.5080  | 12.57 |                                     |          |                                                                                                                                                    | 402881   | 161582  | 308062       | 155432  | 0.00506 | -0.60 | 1.35      | -1.35      |             |
| 525.2852@1.5162116  | HILIC    | -               | 525.2852  | 1.52  |                                     |          |                                                                                                                                                    | 79792    | 23035   | 66433        | 20835   | 0.00507 | -0.61 | 1.41      | -1.20      |             |
| 869.5108@12.008849  | RP       | +               | 869.5108  | 12.01 |                                     |          |                                                                                                                                                    | 192878   | 103934  | 248543       | 148975  | 0.00508 | 0.44  | 1.00      | 1.24       |             |
| 609.5327@13.643559  | RP       | +               | 609.5327  | 13.64 |                                     |          |                                                                                                                                                    | 79570    | 37663   | 106833       | 61939   | 0.00516 | 0.55  | 1.24      | 1.32       |             |
| 287.2112@0.85917485 | HILIC    | +               | 287.2112  | 0.86  |                                     |          |                                                                                                                                                    | 290571   | 118670  | 363767       | 152414  | 0.00521 | 0.54  | 1.24      | 1.25       |             |
| 789.552@12.09506    | RP       | -               | 789.5520  | 12.10 |                                     |          |                                                                                                                                                    | 88528    | 22194   | 112014       | 50029   | 0.00524 | 0.65  | 1.58      | 1.21       |             |
| 162.0526@1.8645687  | HILIC    | -               | 162.0526  | 1.86  | 3-hydroxy-3-methyl-Glutaric acid    | 2        | Hilic (-) 10ev: 161.0454 --> 99.0453 (100), 101.0233 (75), 57.0336 (73), 59.0116 (26)                                                              | 31885    | 11600   | 39058        | 16355   | 0.00526 | 0.51  | 1.54      | 1.22       |             |
| 793.5406@12.341885  | RP       | -               | 793.5406  | 12.34 |                                     |          |                                                                                                                                                    | 618185   | 59763   | 658504       | 69881   | 0.00528 | 0.62  | 1.37      | 1.06       |             |
| 486.187@7.764976    | RP       | +               | 486.1870  | 7.76  |                                     |          |                                                                                                                                                    | 54134    | 29722   | 62166        | 31000   | 0.00546 | 0.26  | 0.72      | 1.30       |             |
| 589.447@1.0995506   | HILIC    | +               | 589.4470  | 1.10  |                                     |          |                                                                                                                                                    | 60006    | 55233   | 58243        | 41662   | 0.00551 | -0.04 | 0.44      | -1.25      |             |
| 879.6001@12.780818  | RP       | -               | 879.6001  | 12.78 | PC(18:0/22:6) [M+FA]                | 2        | RP (-) 20ev: 878.5932 --> 818.567 (100), 878.5894 (35), 327.2354 (23), 283.2746 (6)                                                                | 3865238  | 1074286 | 3242179      | 1047069 | 0.00558 | -0.59 | 1.46      | -1.21      |             |
| 428.1874@6.9188547  | RP       | -               | 428.1874  | 6.92  |                                     |          |                                                                                                                                                    | 1101957  | 404466  | 893230       | 428753  | 0.00570 | -0.50 | 1.14      | -1.29      |             |
| 1696.0623@12.197532 | RP       | +               | 1696.0623 | 12.20 |                                     |          |                                                                                                                                                    | 160307   | 24760   | 145553       | 28202   | 0.00571 | -0.56 | 1.32      | -1.11      |             |
| 244.0696@3.490047   | HILIC    | -               | 244.0696  | 3.49  |                                     |          |                                                                                                                                                    | 551216   | 106660  | 611401       | 99316   | 0.00577 | 0.58  | 1.39      | 1.12       |             |
| 956.9792@3.2017598  | HILIC    | -               | 956.9792  | 3.20  |                                     |          |                                                                                                                                                    | 58939    | 38421   | 39393        | 24933   | 0.00580 | -0.62 | 1.56      | -1.43      |             |
| 509.349@10.413609   | RP       | +               | 509.3490  | 10.41 |                                     |          |                                                                                                                                                    | 308107   | 97219   | 235635       | 104521  | 0.00584 | -0.72 | 1.57      | -1.23      |             |
| 851.6038@10.654809  | RP       | -               | 851.6038  | 10.65 |                                     |          |                                                                                                                                                    | 167868   | 63944   | 140393       | 63493   | 0.00587 | -0.43 | 1.03      | -1.27      |             |
| 129.0787@3.853999   | HILIC    | +               | 129.0787  | 3.85  |                                     |          |                                                                                                                                                    | 377224   | 159116  | 297244       | 122764  | 0.00588 | -0.57 | 1.35      | -1.30      |             |
| 1020.5793@13.244751 | RP       | -               | 1020.5793 | 13.24 |                                     |          |                                                                                                                                                    | 60533    | 32336   | 78807        | 37815   | 0.00590 | 0.52  | 1.14      | 1.27       |             |
| 270.0854@1.7111067  | HILIC    | +               | 270.0854  | 1.71  |                                     |          |                                                                                                                                                    | 31739    | 11888   | 40999        | 17107   | 0.00591 | 0.64  | 1.41      | 1.28       |             |
| 833.5934@12.78987   | RP       | +               | 833.5934  | 12.79 |                                     |          |                                                                                                                                                    | 11725770 | 3367783 | 9777456      | 3186747 | 0.00592 | -0.59 | 1.42      | -1.21      |             |
| 1214.7397@11.987513 | RP       | +               | 1214.7397 | 11.99 |                                     |          |                                                                                                                                                    | 415012   | 129896  | 327328       | 122103  | 0.00596 | -0.70 | 1.48      | -1.24      |             |
| 893.5398@11.984011  | RP       | -               | 893.5398  | 11.98 |                                     |          |                                                                                                                                                    | 748041   | 252428  | 936655       | 305013  | 0.00603 | 0.68  | 1.47      | 1.24       |             |
| 512.2976@7.3008566  | RP       | -               | 512.2976  | 7.30  |                                     |          |                                                                                                                                                    | 229942   | 82968   | 300231       | 155247  | 0.00612 | 0.59  | 1.50      | 1.26       |             |
| 191.0614@1.0291665  | HILIC    | -               | 191.0614  | 1.03  |                                     |          |                                                                                                                                                    | 41851    | 10320   | 47486        | 13189   | 0.00623 | 0.48  | 1.09      | 1.14       |             |
| 360.1939@6.5670795  | RP       | +               | 360.1939  | 6.57  |                                     |          |                                                                                                                                                    | 351618   | 125792  | 289835       | 156933  | 0.00634 | -0.44 | 1.23      | -1.46      |             |
| 642.5201@14.788431  | RP       | +               | 642.5201  | 14.79 |                                     |          |                                                                                                                                                    | 181899   | 74237   | 228980       | 101234  | 0.00637 | 0.54  | 1.24      | 1.26       |             |
| 400.1561@0.7754666  | HILIC    | -               | 400.1561  | 0.78  |                                     |          |                                                                                                                                                    | 108197   | 87479   | 72980        | 63429   | 0.00652 | -0.47 | 0.97      | -1.50      |             |
| 430.3085@9.78305    | RP       | +               | 430.3085  | 9.78  |                                     |          |                                                                                                                                                    | 232638   | 54284   | 270085       | 71986   | 0.00659 | 0.59  | 1.36      | 1.16       |             |
| 923.556@12.826088   | RP       | +               | 923.5560  | 12.83 |                                     |          |                                                                                                                                                    | 100626   | 40361   | 74559        | 46178   | 0.00663 | -0.60 | 1.62      | -1.22      |             |
| 734.5575@11.811462  | RP       | -               | 734.5575  | 11.81 |                                     |          |                                                                                                                                                    | 169434   | 26032   | 190083       | 39336   | 0.00666 | 0.63  | 1.54      | 1.11       |             |
| 741.5003@0.9052334  | HILIC    | -               | 741.5003  | 0.91  |                                     |          |                                                                                                                                                    | 46245    | 11331   | 53737        | 13366   | 0.00675 | 0.61  | 1.38      | 1.16       |             |
| 525.2851@1.7353399  | HILIC    | +               | 525.2851  | 1.74  |                                     |          |                                                                                                                                                    | 645508   | 179208  | 545543       | 164200  | 0.00681 | -0.58 | 1.38      | -1.19      |             |
| 602.5266@14.800132  | RP       | +               | 602.5266  | 14.80 |                                     |          |                                                                                                                                                    | 85778    | 34570   | 108044       | 47635   | 0.00682 | 0.54  | 1.26      | 1.26       |             |
| 2316.6545@12.346231 | RP       | +               | 2316.6545 | 12.35 |                                     |          |                                                                                                                                                    | 244142   | 44247   | 282148       | 70854   | 0.00687 | 0.66  | 1.63      | 1.14       |             |
| 830.5184@11.696765  | RP       | -               | 830.5184  | 11.70 |                                     |          |                                                                                                                                                    | 101063   | 20942   | 108771       | 31588   | 0.00694 | 0.29  | 0.80      | 1.10       |             |
| 226.0719@4.004437   | HILIC    | +               | 226.0719  | 4.00  |                                     |          |                                                                                                                                                    | 117050   | 20960   | 105186       | 18676   | 0.00717 | -0.60 | 1.28      | -1.11      |             |
| 555.3525@10.465272  | RP       | -               | 555.3525  | 10.47 | LysoPC(17:0) [M+FA]                 | 2        | RP (-) 40ev: 554.3447 --> 269.2488 (100)                                                                                                           | 196276   | 96376   | 163163       | 61349   | 0.00729 | -0.42 | 1.03      | -1.20      |             |
| 136.0371@5.537356   | HILIC    | -               | 136.0371  | 5.54  |                                     |          |                                                                                                                                                    | 242646   | 58276   | 281770       | 73909   | 0.00737 | 0.59  | 1.48      | 1.16       |             |
| 2334.625@12.342683  | RP       | +               | 2334.6250 | 12.34 |                                     |          |                                                                                                                                                    | 270438   | 44336   | 309476       | 75822   | 0.00738 | 0.65  | 1.43      | 1.13       |             |
| 190.0104@4.7330585  | HILIC    | -               | 190.0104  | 4.73  |                                     |          |                                                                                                                                                    | 129187   | 16445   | 116082       | 25949   | 0.00742 | -0.62 | 1.45      | -1.14      |             |
| 202.1428@6.379583   | HILIC    | +               | 202.1428  | 6.38  | Putative Symmetric dimethylarginine | 3        | Hilic (+) 10ev: 203.1500 --> 203.1497 (100), 172.1077 (26), 116.0709 (23), 88.0867 (21), 133.0969 (13), 71.0598 (13), 115.0862 (13), 158.1272 (10) | 451683   | 129727  | 524147       | 142421  | 0.00751 | 0.53  | 1.19      | 1.17       |             |
| 154.0379@3.4898462  | HILIC    | -               | 154.0379  | 3.49  |                                     |          |                                                                                                                                                    | 26146    | 5085    | 28978        | 5021    | 0.00751 | 0.56  | 1.31      | 1.11       |             |
| 893.5383@11.976836  | RP       | -               | 893.5383  | 11.98 |                                     |          |                                                                                                                                                    | 672594   | 322364  | 894590       | 358785  | 0.00753 | 0.65  | 1.53      | 1.46       |             |
| 767.5466@12.898651  | RP       | -               | 767.5466  | 12.90 | PE(18:0/20:4)                       | 2        | RP (-) 40ev: 766.5355 --> 303.2342 (100), 283.2700 (53), 575.2390 (27)                                                                             | 111900   | 39541   | 132974       | 43266   | 0.00755 | 0.51  | 1.27      | 1.20       |             |
| 2388.6433@12.2928   | RP       | +               | 2388.6433 | 12.29 |                                     |          |                                                                                                                                                    | 374820   | 94195   | 276506       | 157376  | 0.00769 | -0.78 | 1.76      | -1.20      |             |
| 964.4982@11.994775  | RP       | +               | 964.4982  | 11.99 |                                     |          |                                                                                                                                                    | 63169    | 27723   | 80676        | 32454   | 0.00795 | 0.58  | 1.32      | 1.24       |             |
| 525.2854@1.5170193  | HILIC    | +               | 525.2854  | 1.52  |                                     |          |                                                                                                                                                    | 82034    | 23696   | 69417        | 24509   | 0.00805 | -0.52 | 1.23      | -1.20      |             |
| 259.0787@3.8940961  | HILIC    | -               | 259.0787  | 3.89  |                                     |          |                                                                                                                                                    | 38672    | 17358   | 45732        | 28759   | 0.00811 | 0.31  | 0.86      | 1.22       |             |
| 515.2913@8.706763   | RP       | -               | 515.2913  | 8.71  |                                     |          |                                                                                                                                                    | 261169   | 196406  | 409597       | 364406  | 0.00820 | 0.53  | 1.25      | 1.52       |             |

| Molecular feature   | HILIC/RP | Ionization mode | Mass      | RT    | Identification      | ID level | MSMS fragmentation                                                                                                                 | Control |        | Preeclampsia |        | t-test  | Cohen's | PLS-DA | fold change |
|---------------------|----------|-----------------|-----------|-------|---------------------|----------|------------------------------------------------------------------------------------------------------------------------------------|---------|--------|--------------|--------|---------|---------|--------|-------------|
|                     |          |                 |           |       |                     |          |                                                                                                                                    | Mean    | SD     | Mean         | SD     | p       | d       | VIP    |             |
| 921.57@12.386483    | RP       | -               | 921.5700  | 12.39 |                     |          |                                                                                                                                    | 572230  | 102879 | 519944       | 117402 | 0.00836 | -0.47   | 1.09   | -1.11       |
| 691.5513@12.4505205 | RP       | +               | 691.5513  | 12.45 |                     |          |                                                                                                                                    | 108245  | 21144  | 133233       | 48791  | 0.00839 | 0.71    | 1.69   | 1.18        |
| 871.5557@12.343578  | RP       | -               | 871.5557  | 12.34 |                     |          |                                                                                                                                    | 1675376 | 122677 | 1764173      | 177386 | 0.00841 | 0.59    | 1.29   | 1.05        |
| 431.304@9.094178    | RP       | +               | 431.3040  | 9.09  |                     |          |                                                                                                                                    | 105472  | 57545  | 141994       | 108256 | 0.00844 | 0.44    | 0.98   | 1.39        |
| 494.2688@10.141936  | RP       | -               | 494.2688  | 10.14 |                     |          |                                                                                                                                    | 225492  | 114534 | 160188       | 130174 | 0.00855 | -0.53   | 1.25   | -1.33       |
| 887.5127@12.093563  | RP       | -               | 887.5127  | 12.09 |                     |          |                                                                                                                                    | 41634   | 42282  | 67929        | 50069  | 0.00858 | 0.57    | 1.23   | 1.38        |
| 769.5558@12.535684  | RP       | -               | 769.5558  | 12.54 |                     |          |                                                                                                                                    | 175146  | 67252  | 203131       | 74571  | 0.00862 | 0.39    | 1.10   | 1.16        |
| 894.3199@1.0983336  | HILIC    | -               | 894.3199  | 1.10  |                     |          |                                                                                                                                    | 64559   | 40830  | 62635        | 28974  | 0.00864 | -0.06   | 0.79   | -1.32       |
| 217.9166@7.745498   | HILIC    | -               | 217.9166  | 7.75  |                     |          |                                                                                                                                    | 62472   | 11872  | 68290        | 8127   | 0.00878 | 0.58    | 1.31   | 1.08        |
| 159.0894@4.5981483  | HILIC    | +               | 159.0894  | 4.60  |                     |          |                                                                                                                                    | 216927  | 260573 | 323796       | 301393 | 0.00883 | 0.38    | 0.86   | 1.90        |
| 452.1484@6.2557597  | RP       | -               | 452.1484  | 6.26  |                     |          |                                                                                                                                    | 136598  | 32577  | 118589       | 38484  | 0.00894 | -0.51   | 1.34   | -1.19       |
| 249.0976@1.3908062  | HILIC    | +               | 249.0976  | 1.39  |                     |          |                                                                                                                                    | 48333   | 21433  | 58273        | 20094  | 0.00898 | 0.48    | 1.24   | 1.23        |
| 442.1192@6.262441   | RP       | -               | 442.1192  | 6.26  |                     |          |                                                                                                                                    | 63503   | 9287   | 57653        | 14134  | 0.00912 | -0.50   | 1.38   | -1.13       |
| 400.1563@5.1728754  | RP       | -               | 400.1563  | 5.17  |                     |          |                                                                                                                                    | 99085   | 53921  | 73975        | 44812  | 0.00916 | -0.51   | 1.09   | -1.43       |
| 559.3361@1.0536345  | HILIC    | -               | 559.3361  | 1.05  |                     |          |                                                                                                                                    | 27840   | 16775  | 24642        | 13642  | 0.00917 | -0.21   | 0.82   | -1.19       |
| 961.5254@11.9844055 | RP       | -               | 961.5254  | 11.98 |                     |          |                                                                                                                                    | 258206  | 56069  | 294836       | 69117  | 0.00925 | 0.59    | 1.29   | 1.14        |
| 360.1933@6.5544887  | RP       | -               | 360.1933  | 6.55  |                     |          |                                                                                                                                    | 269171  | 91665  | 227448       | 120095 | 0.00927 | -0.39   | 1.20   | -1.39       |
| 872.5032@11.698853  | RP       | -               | 872.5032  | 11.70 |                     |          |                                                                                                                                    | 94841   | 40599  | 99757        | 53178  | 0.00936 | 0.10    | 0.45   | 1.12        |
| 368.1656@7.537799   | RP       | -               | 368.1656  | 7.54  |                     |          |                                                                                                                                    | 461408  | 183471 | 365566       | 161282 | 0.00937 | -0.56   | 1.21   | -1.31       |
| 315.2406@7.116555   | RP       | +               | 315.2406  | 7.12  | Acylcarnitine 10:0  | 2        | RP (+) 20ev: 316.2479 --> 85.0275 (100)                                                                                            | 81767   | 43802  | 104350       | 57826  | 0.00943 | 0.44    | 1.03   | 1.32        |
| 217.1315@2.0620322  | HILIC    | +               | 217.1315  | 2.06  | Propionylcarnitine  | 1        | Hilic (+) 10ev: 218.1392 --> 218.1392 (100), 85.0286 (72), 159.0654 (21), 60.0808 (13), 144.1017 (5)                               | 578573  | 330670 | 833542       | 578532 | 0.00970 | 0.56    | 1.28   | 1.30        |
| 771.5812@12.986169  | RP       | -               | 771.5812  | 12.99 |                     |          |                                                                                                                                    | 59474   | 20168  | 72877        | 24235  | 0.00986 | 0.60    | 1.36   | 1.20        |
| 1074.644@1.2260188  | HILIC    | -               | 1074.6440 | 1.23  |                     |          |                                                                                                                                    | 96205   | 13346  | 103993       | 15294  | 0.01023 | 0.54    | 1.40   | 1.08        |
| 190.0478@3.0819037  | HILIC    | -               | 190.0478  | 3.08  |                     |          |                                                                                                                                    | 43114   | 10695  | 50804        | 17272  | 0.01028 | 0.55    | 1.24   | 1.16        |
| 637.5647@14.769348  | RP       | +               | 637.5647  | 14.77 |                     |          |                                                                                                                                    | 81624   | 33850  | 101525       | 45760  | 0.01039 | 0.50    | 1.18   | 1.25        |
| 103.0633@4.707264   | HILIC    | +               | 103.0633  | 4.71  | Dimethylglycine     | 2        | Hilic (+) 10ev: 104.0707 --> 58.0648 (100), 104.0715 (12), 45.0332 (9)                                                             | 78643   | 36611  | 96785        | 40846  | 0.01067 | 0.47    | 1.36   | 1.24        |
| 873.546@12.577486   | RP       | +               | 873.5460  | 12.58 |                     |          |                                                                                                                                    | 435667  | 211959 | 383920       | 184222 | 0.01072 | -0.26   | 0.69   | -1.28       |
| 789.5676@0.9100294  | HILIC    | -               | 789.5676  | 0.91  |                     |          |                                                                                                                                    | 73442   | 11782  | 81664        | 16163  | 0.01073 | 0.59    | 1.39   | 1.10        |
| 971.4863@1.2032561  | HILIC    | -               | 971.4863  | 1.20  |                     |          |                                                                                                                                    | 91874   | 41498  | 61684        | 42324  | 0.01073 | -0.72   | 1.50   | -1.37       |
| 400.1552@0.93642324 | HILIC    | -               | 400.1552  | 0.94  |                     |          |                                                                                                                                    | 182903  | 87118  | 142661       | 85030  | 0.01078 | -0.47   | 1.02   | -1.36       |
| 525.2852@1.7314906  | HILIC    | -               | 525.2852  | 1.73  |                     |          |                                                                                                                                    | 515701  | 155427 | 433191       | 141120 | 0.01080 | -0.56   | 1.31   | -1.19       |
| 573.3045@10.882501  | RP       | +               | 573.3045  | 10.88 |                     |          |                                                                                                                                    | 97782   | 52675  | 82736        | 21372  | 0.01083 | -0.41   | 0.95   | -1.15       |
| 1565.1353@12.368895 | RP       | +               | 1565.1353 | 12.37 |                     |          |                                                                                                                                    | 592256  | 113828 | 684837       | 179294 | 0.01090 | 0.63    | 1.55   | 1.14        |
| 875.5614@13.013038  | RP       | +               | 875.5614  | 13.01 |                     |          |                                                                                                                                    | 367520  | 81988  | 426201       | 111856 | 0.01105 | 0.61    | 1.30   | 1.15        |
| 1585.1274@12.31256  | RP       | -               | 1585.1274 | 12.31 |                     |          |                                                                                                                                    | 252080  | 27345  | 274029       | 43129  | 0.01114 | 0.62    | 1.71   | 1.08        |
| 552.1242@1.5662707  | HILIC    | -               | 552.1242  | 1.57  |                     |          |                                                                                                                                    | 35837   | 15023  | 23988        | 15651  | 0.01118 | -0.77   | 1.68   | -1.31       |
| 859.4849@12.201837  | RP       | +               | 859.4849  | 12.20 |                     |          |                                                                                                                                    | 96641   | 12797  | 87179        | 19827  | 0.01148 | -0.58   | 1.45   | -1.09       |
| 496.3035@8.823978   | RP       | -               | 496.3035  | 8.82  |                     |          |                                                                                                                                    | 657047  | 492094 | 392057       | 321273 | 0.01166 | -0.65   | 1.74   | -1.65       |
| 132.0245@4.6032333  | HILIC    | +               | 132.0245  | 4.60  | L-Methionine        | 1        | Hilic (+) 10ev: 150.0583 --> 104.0521 (100), 133.0337 (92), 102.0547 (65), 56.0492 (64), 61.0107 (43), 150.0577 (27), 74.0224 (22) | 163860  | 42839  | 190640       | 57904  | 0.01172 | 0.53    | 1.26   | 1.16        |
| 138.0411@1.0557848  | HILIC    | +               | 138.0411  | 1.06  | Urocanic acid       | 1        | Hilic (+) 10ev: 139.0507 --> 139.0522 (100), 121.0378 (37)                                                                         | 85334   | 57548  | 59838        | 44717  | 0.01175 | -0.50   | 1.14   | -1.44       |
| 593.2739@10.1039715 | RP       | -               | 593.2739  | 10.10 |                     |          |                                                                                                                                    | 87882   | 16187  | 79642        | 14642  | 0.01178 | -0.53   | 1.21   | -1.10       |
| 989.5584@12.394679  | RP       | -               | 989.5584  | 12.39 |                     |          |                                                                                                                                    | 190779  | 59299  | 161345       | 60304  | 0.01178 | -0.49   | 1.09   | -1.22       |
| 535.3639@1.168041   | HILIC    | +               | 535.3639  | 1.17  |                     |          |                                                                                                                                    | 117283  | 49095  | 100051       | 39640  | 0.01208 | -0.39   | 0.91   | -1.20       |
| 510.283@8.005853    | RP       | -               | 510.2830  | 8.01  |                     |          |                                                                                                                                    | 464691  | 239385 | 662674       | 271552 | 0.01220 | 0.77    | 2.02   | 1.21        |
| 738.5086@0.8909575  | HILIC    | +               | 738.5086  | 0.89  |                     |          |                                                                                                                                    | 61734   | 18439  | 75934        | 25376  | 0.01257 | 0.65    | 1.55   | 1.18        |
| 532.265@8.225994    | RP       | +               | 532.2650  | 8.23  |                     |          |                                                                                                                                    | 106760  | 40717  | 133193       | 52000  | 0.01265 | 0.57    | 1.89   | 1.23        |
| 408.1792@4.006833   | HILIC    | +               | 408.1792  | 4.01  |                     |          |                                                                                                                                    | 29540   | 9962   | 25831        | 7739   | 0.01282 | -0.42   | 1.03   | -1.17       |
| 282.1062@1.0151929  | HILIC    | -               | 282.1062  | 1.02  |                     |          |                                                                                                                                    | 50755   | 18668  | 63446        | 31381  | 0.01283 | 0.51    | 1.24   | 1.22        |
| 951.5143@12.740202  | RP       | -               | 951.5143  | 12.74 |                     |          |                                                                                                                                    | 90380   | 50117  | 89718        | 58126  | 0.01283 | -0.01   | 0.96   | 1.07        |
| 683.1949@12.478571  | RP       | +               | 683.1949  | 12.48 |                     |          |                                                                                                                                    | 56725   | 6899   | 53275        | 7670   | 0.01305 | -0.47   | 1.18   | -1.07       |
| 245.1627@1.2881932  | HILIC    | +               | 245.1627  | 1.29  | Isovalerylcarnitine | 1        | Hilic (+) 10ev: 246.1702 --> 246.1706 (100), 187.0961 (15), 85.0278 (14)                                                           | 179919  | 68226  | 272650       | 185220 | 0.01305 | 0.73    | 1.50   | 1.31        |
| 506.251@3.834278    | HILIC    | -               | 506.2510  | 3.83  |                     |          |                                                                                                                                    | 26883   | 11497  | 35751        | 18122  | 0.01309 | 0.60    | 1.35   | 1.29        |
| 147.0892@4.836662   | HILIC    | +               | 147.0892  | 4.84  |                     |          |                                                                                                                                    | 33177   | 6177   | 29806        | 7257   | 0.01314 | -0.50   | 1.14   | -1.13       |
| 659.5443@12.535929  | RP       | -               | 659.5443  | 12.54 |                     |          |                                                                                                                                    | 184146  | 96135  | 239860       | 120674 | 0.01384 | 0.51    | 1.43   | 1.26        |
| 1026.6403@1.2757983 | HILIC    | -               | 1026.6403 | 1.28  |                     |          |                                                                                                                                    | 112623  | 12096  | 119293       | 13439  | 0.01390 | 0.52    | 1.20   | 1.06        |
| 577.4123@1.0854855  | HILIC    | +               | 577.4123  | 1.09  |                     |          |                                                                                                                                    | 60482   | 14083  | 52968        | 11121  | 0.01410 | -0.60   | 1.48   | -1.13       |
| 775.5721@11.998684  | RP       | +               | 775.5721  | 12.00 |                     |          |                                                                                                                                    | 217174  | 60425  | 258125       | 96761  | 0.01423 | 0.52    | 1.34   | 1.17        |
| 400.1556@3.764702   | RP       | -               | 400.1556  | 3.76  |                     |          |                                                                                                                                    | 131014  | 76409  | 99025        | 65083  | 0.01424 | -0.45   | 0.97   | -1.41       |
| 987.525@13.263058   | RP       | +               | 987.5250  | 13.26 |                     |          |                                                                                                                                    | 73040   | 26905  | 77732        | 32309  | 0.01429 | 0.16    | 0.73   | 1.13        |
| 821.5719@11.986627  | RP       | -               | 821.5719  | 11.99 |                     |          |                                                                                                                                    | 65325   | 27603  | 81181        | 30671  | 0.01431 | 0.54    | 1.21   | 1.17        |
| 245.1627@2.8372118  | RP       | +               | 245.1627  | 2.84  | Isovalerylcarnitine | 1        | RP (+) 20ev: 246.1697 --> 85.0287 (100)                                                                                            | 72192   | 25260  | 120597       | 109398 | 0.01448 | 0.72    | 1.41   | 1.33        |
| 470.2349@8.60907    | RP       | -               | 470.2349  | 8.61  |                     |          |                                                                                                                                    | 97846   | 54999  | 75621        | 63716  | 0.01451 | -0.37   | 1.08   | -1.33       |

| Molecular feature   | HILIC/RP | Ionization mode | Mass      | RT    | Identification          | ID level | MSMS fragmentation                                                           | Control  |          | Preeclampsia |          | t-test  |       | Cohen's |  | PLS-DA |       | fold change |
|---------------------|----------|-----------------|-----------|-------|-------------------------|----------|------------------------------------------------------------------------------|----------|----------|--------------|----------|---------|-------|---------|--|--------|-------|-------------|
|                     |          |                 |           |       |                         |          |                                                                              | Mean     | SD       | Mean         | SD       | p       | d     | VIP     |  |        |       |             |
| 454.2388@9.549056   | RP       | -               | 454.2388  | 9.55  |                         |          |                                                                              | 740162   | 712347   | 529532       | 243167   | 0.01480 | -0.44 | 0.96    |  |        |       | -1.29       |
| 719.5469@12.336857  | RP       | +               | 719.5469  | 12.34 |                         |          |                                                                              | 61488    | 31530    | 78585        | 42048    | 0.01504 | 0.46  | 1.23    |  |        | 1.22  |             |
| 581.2809@2.5117543  | HILIC    | -               | 581.2809  | 2.51  |                         |          |                                                                              | 42195    | 18664    | 50928        | 21511    | 0.01519 | 0.43  | 1.32    |  |        | 1.23  |             |
| 646.5052@11.2778015 | RP       | +               | 646.5052  | 11.28 |                         |          |                                                                              | 80564    | 15699    | 90267        | 20043    | 0.01526 | 0.54  | 1.25    |  |        | 1.12  |             |
| 474.1817@7.8172684  | RP       | -               | 474.1817  | 7.82  |                         |          |                                                                              | 74619    | 20472    | 87506        | 24920    | 0.01558 | 0.57  | 1.46    |  |        | 1.17  |             |
| 449.3133@0.9787506  | HILIC    | -               | 449.3133  | 0.98  |                         |          |                                                                              | 105835   | 58783    | 187884       | 153238   | 0.01558 | 0.77  | 1.54    |  |        | 1.51  |             |
| 616.5041@14.538459  | RP       | +               | 616.5041  | 14.54 |                         |          |                                                                              | 138258   | 69208    | 183598       | 137231   | 0.01573 | 0.44  | 1.03    |  |        | 1.29  |             |
| 851.569@12.186493   | RP       | -               | 851.5690  | 12.19 |                         |          |                                                                              | 12548388 | 1817041  | 11559908     | 1818685  | 0.01590 | -0.54 | 1.32    |  |        | -1.09 |             |
| 1221.841@11.990557  | RP       | +               | 1221.8410 | 11.99 |                         |          |                                                                              | 130747   | 50210    | 96744        | 43957    | 0.01609 | -0.72 | 1.50    |  |        | -1.24 |             |
| 430.2024@7.654299   | RP       | -               | 430.2024  | 7.65  |                         |          |                                                                              | 108773   | 58283    | 136536       | 65216    | 0.01612 | 0.45  | 1.31    |  |        | 1.27  |             |
| 476.2771@8.012518   | RP       | +               | 476.2771  | 8.01  |                         |          |                                                                              | 103929   | 32861    | 127215       | 49935    | 0.01613 | 0.56  | 1.71    |  |        | 1.20  |             |
| 745.5685@12.470499  | RP       | +               | 745.5685  | 12.47 |                         |          |                                                                              | 653204   | 142157   | 765881       | 254120   | 0.01617 | 0.57  | 1.54    |  |        | 1.14  |             |
| 920.4742@11.997474  | RP       | +               | 920.4742  | 12.00 |                         |          |                                                                              | 301480   | 90891    | 317487       | 132346   | 0.01622 | 0.14  | 0.93    |  |        | 1.16  |             |
| 1569.0483@12.339632 | RP       | +               | 1569.0483 | 12.34 |                         |          |                                                                              | 402914   | 61453    | 439906       | 79889    | 0.01633 | 0.52  | 1.32    |  |        | 1.09  |             |
| 195.0534@11.6890193 | HILIC    | -               | 195.0534  | 1.69  |                         |          |                                                                              | 38123    | 18428    | 52896        | 40144    | 0.01634 | 0.50  | 1.32    |  |        | 1.31  |             |
| 677.499@11.681348   | RP       | +               | 677.4990  | 11.68 |                         |          |                                                                              | 64642    | 19483    | 82768        | 40807    | 0.01644 | 0.60  | 1.55    |  |        | 1.19  |             |
| 765.5352@12.382901  | RP       | -               | 765.5352  | 12.38 |                         |          |                                                                              | 84680    | 43438    | 103940       | 59744    | 0.01657 | 0.37  | 0.99    |  |        | 1.15  |             |
| 317.9551@5.4183555  | HILIC    | -               | 317.9551  | 5.42  |                         |          |                                                                              | 22860    | 4288     | 20863        | 4287     | 0.01661 | -0.47 | 1.47    |  |        | -1.10 |             |
| 791.6218@12.35525   | RP       | +               | 791.6218  | 12.36 |                         |          |                                                                              | 765510   | 234427   | 628079       | 230905   | 0.01704 | -0.59 | 1.43    |  |        | -1.22 |             |
| 739.5154@12.277361  | RP       | -               | 739.5154  | 12.28 | PE(16:0/20:4)           | 2        | RP (-) 40ev: 738.5055 --> 303.2323 (100), 255.2295 (77), 481.5985 (12)       | 176438   | 53096    | 211121       | 89959    | 0.01732 | 0.48  | 1.19    |  |        | 1.17  |             |
| 593.2722@1.728183   | HILIC    | -               | 593.2722  | 1.73  |                         |          |                                                                              | 44047    | 10175    | 39124        | 10043    | 0.01781 | -0.49 | 1.13    |  |        | -1.13 |             |
| 833.6143@13.582464  | RP       | -               | 833.6143  | 13.58 |                         |          |                                                                              | 1079891  | 316493   | 1250242      | 360850   | 0.01805 | 0.50  | 1.22    |  |        | 1.15  |             |
| 131.0584@5.605106   | HILIC    | -               | 131.0584  | 5.61  |                         |          |                                                                              | 27086    | 8584     | 30569        | 8704     | 0.01809 | 0.40  | 0.97    |  |        | 1.14  |             |
| 775.5379@11.868371  | RP       | -               | 775.5379  | 11.87 |                         |          |                                                                              | 384867   | 83417    | 465652       | 201736   | 0.01815 | 0.57  | 1.56    |  |        | 1.16  |             |
| 814.3627@1.0971489  | HILIC    | -               | 814.3627  | 1.10  |                         |          |                                                                              | 58180    | 39116    | 38646        | 26845    | 0.01816 | -0.59 | 1.33    |  |        | -1.41 |             |
| 1132.6707@10.09094  | RP       | -               | 1132.6707 | 10.09 |                         |          |                                                                              | 228015   | 67785    | 192939       | 70965    | 0.01831 | -0.51 | 1.22    |  |        | -1.24 |             |
| 554.2615@2.5123467  | HILIC    | -               | 554.2615  | 2.51  |                         |          |                                                                              | 47559    | 20185    | 57172        | 21117    | 0.01849 | 0.47  | 1.33    |  |        | 1.22  |             |
| 791.5681@12.455627  | RP       | -               | 791.5681  | 12.46 |                         |          |                                                                              | 282076   | 82592    | 347673       | 162234   | 0.01859 | 0.54  | 1.40    |  |        | 1.18  |             |
| 267.0952@4.815787   | HILIC    | -               | 267.0952  | 4.82  |                         |          |                                                                              | 56295    | 25613    | 71429        | 44274    | 0.01869 | 0.43  | 1.07    |  |        | 1.21  |             |
| 1087.6674@10.09895  | RP       | +               | 1087.6674 | 10.10 |                         |          |                                                                              | 559741   | 257383   | 460394       | 218668   | 0.01869 | -0.42 | 1.09    |  |        | -1.24 |             |
| 578.2864@12.535063  | RP       | -               | 578.2864  | 12.54 |                         |          |                                                                              | 58622    | 7719     | 64874        | 13221    | 0.01889 | 0.60  | 1.79    |  |        | 1.09  |             |
| 143.0949@3.5161455  | HILIC    | +               | 143.0949  | 3.52  | Proline betaine         | 1        | Hilic (+) 20ev: 144.1019 --> 144.1026 (100), 84.0804 (30), 58.0658 (27)      | 12777176 | 11323868 | 20049899     | 13199074 | 0.01892 | 0.59  | 1.28    |  |        | 1.77  |             |
| 117.079@3.724379    | HILIC    | +               | 117.0790  | 3.72  | Glycine betaine         | 1        | Hilic (+) 20ev: 235.1654 (2M+H) --> 118.0870 (100), 58.0658 (5), 59.0734 (3) | 19002820 | 3860076  | 22190270     | 6781920  | 0.01911 | 0.60  | 1.36    |  |        | 1.14  |             |
| 571.3627@1.1220587  | HILIC    | +               | 571.3627  | 1.12  |                         |          |                                                                              | 221743   | 59268    | 193296       | 50593    | 0.01939 | -0.52 | 1.32    |  |        | -1.15 |             |
| 285.1368@8.280059   | RP       | +               | 285.1368  | 8.28  |                         |          |                                                                              | 191858   | 183878   | 123060       | 101681   | 0.01970 | -0.48 | 1.37    |  |        | -1.53 |             |
| 511.2605@8.417275   | RP       | -               | 511.2605  | 8.42  |                         |          |                                                                              | 200572   | 131468   | 150978       | 78917    | 0.02011 | -0.47 | 1.06    |  |        | -1.25 |             |
| 113.0587@5.557785   | HILIC    | +               | 113.0587  | 5.56  |                         |          |                                                                              | 26456    | 4413     | 29082        | 5808     | 0.02024 | 0.51  | 1.20    |  |        | 1.09  |             |
| 216.081@0.95221126  | HILIC    | -               | 216.0810  | 0.95  |                         |          |                                                                              | 315116   | 180357   | 246560       | 186503   | 0.02075 | -0.37 | 1.19    |  |        | -1.36 |             |
| 430.3084@9.7766285  | RP       | -               | 430.3084  | 9.78  |                         |          |                                                                              | 101874   | 22784    | 114932       | 28697    | 0.02090 | 0.51  | 1.16    |  |        | 1.13  |             |
| 633.3253@1.2259898  | HILIC    | -               | 633.3253  | 1.23  |                         |          |                                                                              | 47115    | 5348     | 50234        | 7061     | 0.02096 | 0.50  | 1.31    |  |        | 1.06  |             |
| 226.1063@7.120571   | HILIC    | +               | 226.1063  | 7.12  |                         |          |                                                                              | 34712    | 34741    | 48459        | 32770    | 0.02104 | 0.41  | 0.97    |  |        | 1.40  |             |
| 543.3332@1.0606511  | HILIC    | +               | 543.3332  | 1.06  |                         |          |                                                                              | 2551839  | 825808   | 2116594      | 712057   | 0.02105 | -0.57 | 1.32    |  |        | -1.22 |             |
| 280.2403@10.252119  | RP       | +               | 280.2403  | 10.25 |                         |          |                                                                              | 207195   | 74728    | 164040       | 100869   | 0.02121 | -0.49 | 1.21    |  |        | -1.30 |             |
| 386.1759@5.665372   | RP       | -               | 386.1759  | 5.67  |                         |          |                                                                              | 383070   | 227442   | 294506       | 160549   | 0.02126 | -0.46 | 0.99    |  |        | -1.38 |             |
| 484.21@7.8236794    | RP       | -               | 484.2100  | 7.82  |                         |          |                                                                              | 126896   | 39892    | 149150       | 47441    | 0.02132 | 0.51  | 1.38    |  |        | 1.17  |             |
| 512.2978@8.0061245  | RP       | -               | 512.2978  | 8.01  |                         |          |                                                                              | 572153   | 193490   | 714389       | 290045   | 0.02155 | 0.59  | 1.78    |  |        | 1.19  |             |
| 867.4565@11.708105  | RP       | +               | 867.4565  | 11.71 |                         |          |                                                                              | 110271   | 30092    | 128581       | 52497    | 0.02169 | 0.44  | 1.18    |  |        | 1.17  |             |
| 496.3029@2.6258078  | HILIC    | -               | 496.3029  | 2.63  |                         |          |                                                                              | 111720   | 152598   | 132615       | 133193   | 0.02170 | 0.15  | 0.88    |  |        | 1.44  |             |
| 771.578@12.635234   | RP       | +               | 771.5780  | 12.64 | PC(35:2)                | 2        | RP (+) 20ev: 772.5840 --> 772.5840 (100), 184.0727 (94)                      | 330498   | 186435   | 402964       | 217005   | 0.02175 | 0.36  | 0.93    |  |        | 1.22  |             |
| 579.3091@9.994616   | RP       | -               | 579.3091  | 9.99  |                         |          |                                                                              | 104894   | 40762    | 89051        | 20754    | 0.02194 | -0.52 | 1.05    |  |        | -1.15 |             |
| 1235.8538@11.993524 | RP       | +               | 1235.8538 | 11.99 |                         |          |                                                                              | 99078    | 59984    | 81520        | 29861    | 0.02228 | -0.39 | 0.84    |  |        | -1.19 |             |
| 845.5705@12.895138  | RP       | -               | 845.5705  | 12.90 |                         |          |                                                                              | 778350   | 93531    | 731730       | 97365    | 0.02239 | -0.49 | 1.11    |  |        | -1.07 |             |
| 315.241@0.7382813   | HILIC    | +               | 315.2410  | 0.74  |                         |          |                                                                              | 163833   | 81013    | 203818       | 96208    | 0.02239 | 0.45  | 1.06    |  |        | 1.25  |             |
| 675.5394@0.9206664  | HILIC    | +               | 675.5394  | 0.92  |                         |          |                                                                              | 264597   | 71568    | 300816       | 63335    | 0.02251 | 0.54  | 1.20    |  |        | 1.13  |             |
| 453.1855@11.18902   | RP       | -               | 453.1855  | 11.19 |                         |          |                                                                              | 63044    | 33863    | 78420        | 40745    | 0.02266 | 0.41  | 1.45    |  |        | 1.21  |             |
| 779.5472@11.997335  | RP       | +               | 779.5472  | 12.00 | PC(16:1/20:4), PC(36:5) | 2        | RP (+) 20ev: 780.5533 --> 780.5548 (100), 184.0735 (91)                      | 8674133  | 3908149  | 11876895     | 6285075  | 0.02273 | 0.63  | 1.35    |  |        | 1.28  |             |
| 477.322@1.1197767   | HILIC    | +               | 477.3220  | 1.12  |                         |          |                                                                              | 32426    | 7943     | 28686        | 5825     | 0.02289 | -0.54 | 1.30    |  |        | -1.12 |             |
| 175.1322@3.7250874  | HILIC    | +               | 175.1322  | 3.73  |                         |          |                                                                              | 125353   | 25158    | 143172       | 36606    | 0.02314 | 0.58  | 1.32    |  |        | 1.12  |             |
| 563.2409@1.7335339  | HILIC    | +               | 563.2409  | 1.73  |                         |          |                                                                              | 40600    | 11362    | 35367        | 11047    | 0.02348 | -0.47 | 1.10    |  |        | -1.16 |             |
| 464.2036@3.5655437  | HILIC    | -               | 464.2036  | 3.57  |                         |          |                                                                              | 225032   | 159594   | 183674       | 151459   | 0.02362 | -0.27 | 0.92    |  |        | -1.49 |             |
| 250.1207@8.708699   | RP       | +               | 250.1207  | 8.71  |                         |          |                                                                              | 128906   | 39913    | 111663       | 41425    | 0.02376 | -0.42 | 1.02    |  |        | -1.17 |             |
| 280.0461@1.4785385  | HILIC    | -               | 280.0461  | 1.48  |                         |          |                                                                              | 111044   | 39686    | 95795        | 38498    | 0.02403 | -0.39 | 1.17    |  |        | -1.19 |             |
| 576.5114@14.54596   | RP       | +               | 576.5114  | 14.55 |                         |          |                                                                              | 81043    | 40890    | 107225       | 83272    | 0.02438 | 0.42  | 0.99    |  |        | 1.27  |             |
| 188.1273@6.820254   | HILIC    | +               | 188.1273  | 6.82  |                         |          |                                                                              | 293114   | 120662   | 240867       | 109066   | 0.02464 | -0.45 | 1.18    |  |        | -1.25 |             |
| 601.2051@1.3948046  | HILIC    | -               | 601.2051  | 1.39  |                         | </       |                                                                              |          |          |              |          |         |       |         |  |        |       |             |



| Molecular feature   | HILIC/RP | Ionization mode | Mass      | RT    | Identification                            | ID level | MSMS fragmentation                                                       | Control            |         | Preeclampsia                                                             |              | t-test<br>p | Cohen's<br>d                                                           | PLS-DA<br>VIP | fold<br>change |         |        |         |       |      |       |
|---------------------|----------|-----------------|-----------|-------|-------------------------------------------|----------|--------------------------------------------------------------------------|--------------------|---------|--------------------------------------------------------------------------|--------------|-------------|------------------------------------------------------------------------|---------------|----------------|---------|--------|---------|-------|------|-------|
|                     |          |                 |           |       |                                           |          |                                                                          | Mean               | SD      | Mean                                                                     | SD           |             |                                                                        |               |                |         |        |         |       |      |       |
| 729.5306@11.87732   | RP       | +               | 729.5306  | 11.88 | PC(32:2)                                  | 2        | RP (+) 20ev: 730.5377 --> 184.0735 (100), 730.5343 (68)                  | 853369             | 234654  | 1075027                                                                  | 624197       | 0.02479     | 0.52                                                                   | 1.33          | 1.18           |         |        |         |       |      |       |
| 370.1807@7.301601   | RP       | -               | 370.1807  | 7.30  |                                           |          |                                                                          | 156970             | 68977   | 130632                                                                   | 83205        | 0.02480     | -0.35                                                                  | 0.94          | -1.27          |         |        |         |       |      |       |
| 949.5349@1.0824422  | HILIC    | -               | 949.5349  | 1.08  |                                           |          |                                                                          | 234070             | 50851   | 256104                                                                   | 45373        | 0.02481     | 0.46                                                                   | 1.12          | 1.10           |         |        |         |       |      |       |
| 416.3284@10.466216  | RP       | -               | 416.3284  | 10.47 |                                           |          |                                                                          | 82856              | 18007   | 73609                                                                    | 20166        | 0.02484     | -0.48                                                                  | 1.22          | -1.14          |         |        |         |       |      |       |
| 681.321@5.476809    | RP       | +               | 681.3210  | 5.48  |                                           |          |                                                                          | 91713              | 25779   | 103510                                                                   | 25596        | 0.02507     | 0.46                                                                   | 1.03          | 1.13           |         |        |         |       |      |       |
| 723.522@12.53409    | RP       | +               | 723.5220  | 12.53 |                                           |          |                                                                          | 87860              | 38363   | 101039                                                                   | 45396        | 0.02517     | 0.31                                                                   | 0.82          | 1.12           |         |        |         |       |      |       |
| 386.1765@0.8306829  | HILIC    | -               | 386.1765  | 0.83  |                                           |          |                                                                          | 209382             | 121008  | 161947                                                                   | 95389        | 0.02551     | -0.44                                                                  | 0.96          | -1.34          |         |        |         |       |      |       |
| 400.3342@11.222746  | RP       | +               | 400.3342  | 11.22 |                                           |          |                                                                          | 571971             | 541087  | 417410                                                                   | 418209       | 0.02553     | -0.32                                                                  | 0.92          | -1.63          |         |        |         |       |      |       |
| 180.0645@2.8150213  | RP       | +               | 180.0645  | 2.82  |                                           |          |                                                                          | 134911             | 129374  | 88456                                                                    | 130522       | 0.02575     | -0.36                                                                  | 0.85          | -1.56          |         |        |         |       |      |       |
| 182.0787@4.8177304  | HILIC    | -               | 182.0787  | 4.82  |                                           |          |                                                                          | 1347198            | 694723  | 1774755                                                                  | 1427525      | 0.02618     | 0.40                                                                   | 0.96          | 1.23           |         |        |         |       |      |       |
| 532.2615@1.4044235  | HILIC    | -               | 532.2615  | 1.40  |                                           |          |                                                                          | 33080              | 5345    | 30709                                                                    | 4889         | 0.02629     | -0.46                                                                  | 1.11          | -1.08          |         |        |         |       |      |       |
| 467.301@1.2204363   | HILIC    | +               | 467.3010  | 1.22  |                                           |          |                                                                          | 76386              | 18543   | 67643                                                                    | 14312        | 0.02636     | -0.53                                                                  | 1.30          | -1.12          |         |        |         |       |      |       |
| 423.3344@0.9959999  | RP       | +               | 423.3344  | 9.06  |                                           |          |                                                                          | Acylcarnitine 18:2 | 2       | RP (+) 20ev: 424.3426 --> 85.0280 (100), 424.3444 (59)                   | 174699       | 69136       | 224107                                                                 | 119309        | 0.02647        | 0.52    | 1.28   | 1.23    |       |      |       |
| 500.3893@12.976044  | RP       | +               | 500.3893  | 12.98 |                                           |          |                                                                          |                    |         |                                                                          | 120583       | 20162       | 111682                                                                 | 25508         | 0.02659        | -0.39   | 1.17   | -1.09   |       |      |       |
| 817.5006@12.010333  | RP       | +               | 817.5006  | 12.01 |                                           |          |                                                                          |                    |         |                                                                          | 185442       | 73221       | 229274                                                                 | 108907        | 0.02664        | 0.48    | 1.16   | 1.23    |       |      |       |
| 272.1143@3.723787   | HILIC    | +               | 272.1143  | 3.72  | 71461                                     | 29915    | 101479                                                                   |                    |         |                                                                          | 59922        | 0.02689     | 0.67                                                                   | 1.44          | 1.29           |         |        |         |       |      |       |
| 268.1313@8.701549   | RP       | -               | 268.1313  | 8.70  | 148297                                    | 45292    | 129422                                                                   |                    |         |                                                                          | 47433        | 0.02693     | -0.41                                                                  | 1.03          | -1.17          |         |        |         |       |      |       |
| 1053.6566@1.2676214 | HILIC    | -               | 1053.6566 | 1.27  | Pantothenic acid                          | 1        | Hilic (-) 10ev: 218.1037 --> 88.0396 (100), 146.0807 (45), 218.1025 (19) | 51891              | 9008    | 55510                                                                    | 5728         | 0.02699     | 0.49                                                                   | 1.11          | 1.05           |         |        |         |       |      |       |
| 219.1107@1.0154812  | HILIC    | -               | 219.1107  | 1.02  |                                           |          |                                                                          | 237817             | 95365   | 290529                                                                   | 147820       | 0.02855     | 0.43                                                                   | 1.13          | 1.20           |         |        |         |       |      |       |
| 1192.7@0.9425776    | HILIC    | -               | 1192.7000 | 0.94  |                                           |          |                                                                          | 156751             | 46803   | 133927                                                                   | 48089        | 0.02857     | -0.48                                                                  | 1.35          | -1.21          |         |        |         |       |      |       |
| 474.4068@12.427006  | RP       | -               | 474.4068  | 12.43 | 131831                                    | 17709    | 123754                                                                   | 19835              | 0.02860 | -0.43                                                                    | 1.32         | -1.07       |                                                                        |               |                |         |        |         |       |      |       |
| 700.5532@0.8998446  | HILIC    | +               | 700.5532  | 0.90  | Plasmenyl-PC 34:1; PC(P-16:0/18:1) [M+FA] | 2        | RP (-) 40ev: 788.5764 --> 281.2463 (100)                                 | 6149126            | 2069193 | 6962870                                                                  | 1642391      | 0.02946     | 0.44                                                                   | 0.96          | 1.18           |         |        |         |       |      |       |
| 845.5708@12.641301  | RP       | -               | 845.5708  | 12.64 |                                           |          |                                                                          | 181158             | 44008   | 170346                                                                   | 103993       | 0.02993     | -0.15                                                                  | 0.40          | 1.14           |         |        |         |       |      |       |
| 220.0347@4.90566    | HILIC    | +               | 220.0347  | 4.91  |                                           |          |                                                                          | 38858              | 11203   | 45810                                                                    | 20215        | 0.03000     | 0.44                                                                   | 1.04          | 1.14           |         |        |         |       |      |       |
| 889.5581@12.993369  | RP       | -               | 889.5581  | 12.99 |                                           |          |                                                                          | 226806             | 48626   | 253901                                                                   | 59856        | 0.03027     | 0.50                                                                   | 1.27          | 1.11           |         |        |         |       |      |       |
| 789.5893@13.0940695 | RP       | +               | 789.5893  | 13.09 |                                           |          |                                                                          | 172643             | 38524   | 204371                                                                   | 67793        | 0.03035     | 0.60                                                                   | 1.53          | 1.15           |         |        |         |       |      |       |
| 129.0422@6.334001   | HILIC    | +               | 129.0422  | 6.33  |                                           |          |                                                                          | 62404              | 47475   | 68146                                                                    | 77968        | 0.03039     | 0.09                                                                   | 0.74          | 1.24           |         |        |         |       |      |       |
| 597.2515@10.090644  | RP       | +               | 597.2515  | 10.09 |                                           |          |                                                                          | 286769             | 25402   | 270537                                                                   | 42439        | 0.03079     | -0.48                                                                  | 1.08          | -1.08          |         |        |         |       |      |       |
| 371.3037@8.699058   | RP       | +               | 371.3037  | 8.70  |                                           |          |                                                                          | Acylcarnitine 14:0 | 2       | RP (+) 20ev: 372.3121 --> 85.0288 (100), 372.3130 (26)                   | 79715        | 46468       | 93371                                                                  | 39920         | 0.03117        | 0.32    | 1.02   | 1.23    |       |      |       |
| 398.3179@10.486338  | RP       | +               | 398.3179  | 10.49 |                                           |          |                                                                          |                    |         |                                                                          | 64762        | 20447       | 77596                                                                  | 27919         | 0.03124        | 0.53    | 1.21   | 1.19    |       |      |       |
| 729.5868@0.86800987 | HILIC    | +               | 729.5868  | 0.87  |                                           |          |                                                                          |                    |         |                                                                          | 965413       | 269008      | 1108108                                                                | 323338        | 0.03172        | 0.48    | 1.09   | 1.14    |       |      |       |
| 885.5289@12.267553  | RP       | -               | 885.5289  | 12.27 |                                           |          |                                                                          |                    |         |                                                                          | 89409        | 50757       | 70382                                                                  | 49785         | 0.03182        | -0.38   | 0.84   | -1.32   |       |      |       |
| 414.2074@7.454301   | RP       | -               | 414.2074  | 7.45  |                                           |          |                                                                          |                    |         |                                                                          | 442693       | 201473      | 353413                                                                 | 179872        | 0.03254        | -0.47   | 1.28   | -1.29   |       |      |       |
| 2460.646@12.195539  | RP       | +               | 2460.6460 | 12.20 |                                           |          |                                                                          | 453144             | 97946   | 407753                                                                   | 116678       | 0.03276     | -0.42                                                                  | 1.31          | -1.13          |         |        |         |       |      |       |
| 557.2869@10.120011  | RP       | +               | 557.2869  | 10.12 |                                           |          |                                                                          | 114498             | 68640   | 120525                                                                   | 74014        | 0.03283     | 0.08                                                                   | 0.81          | 1.08           |         |        |         |       |      |       |
| 379.2485@9.866395   | RP       | -               | 379.2485  | 9.87  |                                           |          |                                                                          | 58526              | 12377   | 66911                                                                    | 21164        | 0.03292     | 0.50                                                                   | 1.13          | 1.12           |         |        |         |       |      |       |
| 464.1845@8.469367   | RP       | -               | 464.1845  | 8.47  | 170768                                    | 61867    | 144675                                                                   | 60238              | 0.03350 | -0.43                                                                    | 1.24         | -1.25       |                                                                        |               |                |         |        |         |       |      |       |
| 527.3007@10.316618  | RP       | -               | 527.3007  | 10.32 | 77013                                     | 32327    | 64316                                                                    | 27272              | 0.03367 | -0.43                                                                    | 1.05         | -1.21       |                                                                        |               |                |         |        |         |       |      |       |
| 644.489@0.9676118   | HILIC    | +               | 644.4890  | 0.97  | 82031                                     | 19867    | 92618                                                                    | 22173              | 0.03404 | 0.50                                                                     | 1.13         | 1.14        |                                                                        |               |                |         |        |         |       |      |       |
| 823.5854@13.585062  | RP       | -               | 823.5854  | 13.59 | 142551                                    | 42230    | 153137                                                                   | 63205              | 0.03429 | 0.20                                                                     | 0.76         | 1.15        |                                                                        |               |                |         |        |         |       |      |       |
| 705.3641@3.108067   | HILIC    | -               | 705.3641  | 3.11  | 61019                                     | 29753    | 49979                                                                    | 12923              | 0.03444 | -0.52                                                                    | 1.03         | -1.15       |                                                                        |               |                |         |        |         |       |      |       |
| 202.0454@1.4684619  | HILIC    | -               | 202.0454  | 1.47  | 139319                                    | 32214    | 154135                                                                   | 35107              | 0.03449 | 0.44                                                                     | 1.03         | 1.11        |                                                                        |               |                |         |        |         |       |      |       |
| 183.0661@1.2741668  | HILIC    | +               | 183.0661  | 1.27  | 106503                                    | 26351    | 93473                                                                    | 26211              | 0.03484 | -0.50                                                                    | 1.18         | -1.11       |                                                                        |               |                |         |        |         |       |      |       |
| 179.0587@0.96752876 | HILIC    | -               | 179.0587  | 0.97  | Hippuric acid                             | 1        | Hilic (-) 10ev: 178.0514 --> 178.0510 (100), 77.0393 (76), 134.0606 (65) | 551116             | 460445  | 780848                                                                   | 725179       | 0.03498     | 0.39                                                                   | 0.90          | 1.38           |         |        |         |       |      |       |
| 642.5222@13.789012  | RP       | +               | 642.5222  | 13.79 |                                           |          |                                                                          | 213720             | 79279   | 178576                                                                   | 55310        | 0.03533     | -0.52                                                                  | 1.11          | -1.18          |         |        |         |       |      |       |
| 856.5153@11.61291   | RP       | -               | 856.5153  | 11.61 |                                           |          |                                                                          | 56037              | 10859   | 60140                                                                    | 16117        | 0.03544     | 0.30                                                                   | 0.90          | 1.09           |         |        |         |       |      |       |
| 1014.1732@9.66997   | RP       | +               | 1014.1732 | 9.67  |                                           |          |                                                                          | 57588              | 8343    | 53716                                                                    | 9249         | 0.03566     | -0.44                                                                  | 1.62          | -1.08          |         |        |         |       |      |       |
| 1044.6198@10.102865 | RP       | -               | 1044.6198 | 10.10 |                                           |          |                                                                          | 203099             | 49374   | 180871                                                                   | 51341        | 0.03631     | -0.44                                                                  | 1.13          | -1.13          |         |        |         |       |      |       |
| 428.187@1.0038841   | HILIC    | -               | 428.1870  | 1.00  |                                           |          |                                                                          | 755432             | 295107  | 653950                                                                   | 342922       | 0.03649     | -0.32                                                                  | 0.80          | -1.23          |         |        |         |       |      |       |
| 681.3218@1.2354108  | HILIC    | +               | 681.3218  | 1.24  |                                           |          |                                                                          | 69062              | 21424   | 77830                                                                    | 21094        | 0.03668     | 0.41                                                                   | 0.96          | 1.13           |         |        |         |       |      |       |
| 570.2561@3.8983264  | HILIC    | -               | 570.2561  | 3.90  |                                           |          |                                                                          | 48921              | 15139   | 57603                                                                    | 21075        | 0.03688     | 0.48                                                                   | 1.41          | 1.16           |         |        |         |       |      |       |
| 726.5677@0.8673108  | HILIC    | +               | 726.5677  | 0.87  |                                           |          |                                                                          | 1323094            | 363474  | 1488097                                                                  | 389980       | 0.03794     | 0.44                                                                   | 1.00          | 1.13           |         |        |         |       |      |       |
| 129.0426@6.1003704  | HILIC    | +               | 129.0426  | 6.10  |                                           |          |                                                                          | Glutamine          | 1       | Hilic (+) 10ev: 147.0767 --> 130.0508 (100), 84.0450 (90), 147.0771 (12) | 3126892      | 947141      | 3592597                                                                | 1019731       | 0.03798        | 0.47    | 1.23   | 1.19    |       |      |       |
| 567.3328@10.086635  | RP       | +               | 567.3328  | 10.09 |                                           |          |                                                                          |                    |         |                                                                          | LysoPC(22:6) | 2           | RP (+) 20ev: 568.3412 --> 568.3399 (100), 104.1068 (94), 184.0734 (80) | 1995253       | 516856         | 1744273 | 512926 | 0.03803 | -0.49 | 1.16 | -1.14 |
| 402.1552@10.578373  | RP       | -               | 402.1552  | 10.58 |                                           |          |                                                                          |                    |         |                                                                          |              |             |                                                                        | 90597         | 45178          | 78404   | 50176  | 0.03805 | -0.26 | 0.69 | -1.23 |
| 252.2087@9.446652   | RP       | +               | 252.2087  | 9.45  |                                           |          |                                                                          |                    |         |                                                                          |              |             |                                                                        | 132977        | 21947          | 142147  | 20920  | 0.03813 | 0.43  | 1.05 | 1.07  |
| 769.5978@12.989144  | RP       | +               | 769.5978  | 12.99 |                                           |          |                                                                          |                    |         |                                                                          |              |             |                                                                        | 797120        | 170744         | 898470  | 250917 | 0.03814 | 0.48  | 1.31 | 1.11  |
| 625.2108@10.105425  | RP       | -               | 625.2108  | 10.11 |                                           |          |                                                                          | 61863              | 15135   | 55800                                                                    |              |             |                                                                        | 15080         | 0.03838        | -0.40   | 1.06   | -1.12   |       |      |       |
| 713.2657@10.087964  | RP       | -               | 713.2657  | 10.09 | 50727                                     | 16526    | 55499                                                                    | 14147              | 0.03933 | 0.31                                                                     |              |             |                                                                        | 0.74          | 1.07           |         |        |         |       |      |       |
| 465.3081@2.1922042  | HILIC    | -               | 465.3081  | 2.19  | 30112                                     | 21951    | 40969                                                                    | 39668              | 0.03972 | 0.35                                                                     |              |             |                                                                        | 1.05          | 1.38           |         |        |         |       |      |       |
| 569.2481@1.7287089  | HILIC    | +               | 569.2481  | 1.73  | 25206                                     | 5748     | 22765                                                                    | 5893               | 0.03978 | -0.42                                                                    |              |             |                                                                        | 1.01          | -1.12          |         |        |         |       |      |       |
| 427.3661@9.582857   | RP       | +               | 427.3661  | 9.58  | 96250                                     | 28721    | 112819                                                                   | 41002              | 0.04000 | 0.48                                                                     |              |             |                                                                        | 1.21          | 1.16           |         |        |         |       |      |       |
| 334.1013@1.4575667  | HILIC    | -               | 334.1013  | 1.46  | 528501                                    | 152365   | 615988                                                                   | 200381             | 0.04055 | 0.50                                                                     |              |             |                                                                        | 1.25          | 1.16           |         |        |         |       |      |       |
| 384.2278@3.2201931  | HILIC    | -               | 384.2278  | 3.22  | 30111                                     | 2988     | 28762                                                                    | 3446               | 0.04079 | -0.42                                                                    |              |             |                                                                        | 1.17          | -1.05          |         |        |         |       |      |       |

| Molecular feature   | HILIC/RP | Ionization mode | Mass      | RT    | Identification      | ID level | MSMS fragmentation                                                        | Control  |         | Preeclampsia |         | t-test  |       | Cohen's |  | PLS-DA |       | fold change |
|---------------------|----------|-----------------|-----------|-------|---------------------|----------|---------------------------------------------------------------------------|----------|---------|--------------|---------|---------|-------|---------|--|--------|-------|-------------|
|                     |          |                 |           |       |                     |          |                                                                           | Mean     | SD      | Mean         | SD      | p       | d     | VIP     |  |        |       |             |
| 645.4404@10.93041   | RP       | -               | 645.4404  | 10.93 |                     |          |                                                                           | 202304   | 151181  | 178865       | 186577  | 0.04082 | -0.14 | 0.55    |  |        | -1.38 |             |
| 515.283@12.536035   | RP       | -               | 515.2830  | 12.54 |                     |          |                                                                           | 384426   | 94140   | 461351       | 159758  | 0.04092 | 0.61  | 1.73    |  |        | 1.15  |             |
| 2501.6184@12.196392 | RP       | +               | 2501.6184 | 12.20 |                     |          |                                                                           | 261900   | 60777   | 240042       | 70617   | 0.04104 | -0.33 | 1.13    |  |        | -1.10 |             |
| 633.3257@10.110894  | RP       | -               | 633.3257  | 10.11 |                     |          |                                                                           | 263838   | 28534   | 276935       | 30068   | 0.04123 | 0.45  | 1.15    |  |        | 1.05  |             |
| 805.5626@12.192729  | RP       | +               | 805.5626  | 12.19 | PC(38:6)            | 2        | RP (+) 20ev: 806.5690 --> 806.5665 (100), 184.0729 (79)                   | 37774739 | 6090142 | 35074786     | 5749044 | 0.04128 | -0.46 | 1.14    |  |        | -1.08 |             |
| 539.3288@1.1641488  | HILIC    | -               | 539.3288  | 1.16  |                     |          |                                                                           | 41292    | 28997   | 41850        | 32550   | 0.04138 | 0.02  | 0.41    |  |        | 1.15  |             |
| 1048.5522@1.7379898 | HILIC    | -               | 1048.5522 | 1.74  |                     |          |                                                                           | 43150    | 22106   | 37305        | 18070   | 0.04167 | -0.29 | 0.91    |  |        | -1.22 |             |
| 532.3791@10.712787  | RP       | +               | 532.3791  | 10.71 |                     |          |                                                                           | 72257    | 18686   | 66412        | 16638   | 0.04210 | -0.33 | 0.84    |  |        | -1.11 |             |
| 575.2884@12.535034  | RP       | -               | 575.2884  | 12.54 |                     |          |                                                                           | 163281   | 32502   | 166435       | 66274   | 0.04216 | 0.06  | 1.01    |  |        | 1.09  |             |
| 412.1925@6.762241   | RP       | -               | 412.1925  | 6.76  |                     |          |                                                                           | 3310175  | 1446225 | 2816616      | 1797652 | 0.04243 | -0.30 | 0.95    |  |        | -1.30 |             |
| 348.2271@10.713488  | RP       | -               | 348.2271  | 10.71 |                     |          |                                                                           | 136936   | 60283   | 118057       | 64245   | 0.04250 | -0.30 | 0.80    |  |        | -1.20 |             |
| 147.0897@4.7955923  | HILIC    | -               | 147.0897  | 4.80  |                     |          |                                                                           | 28422    | 6695    | 31820        | 6999    | 0.04255 | 0.50  | 1.19    |  |        | 1.09  |             |
| 865.5834@12.464234  | RP       | -               | 865.5834  | 12.46 |                     |          |                                                                           | 141694   | 43573   | 123486       | 37824   | 0.04273 | -0.45 | 1.01    |  |        | -1.14 |             |
| 1050.6418@1.2461473 | HILIC    | -               | 1050.6418 | 1.25  |                     |          |                                                                           | 66931    | 11485   | 70235        | 14353   | 0.04280 | 0.26  | 0.78    |  |        | 1.05  |             |
| 416.2221@0.89462477 | HILIC    | -               | 416.2221  | 0.89  |                     |          |                                                                           | 209098   | 111264  | 169510       | 113783  | 0.04296 | -0.35 | 0.79    |  |        | -1.35 |             |
| 532.2647@4.269912   | HILIC    | +               | 532.2647  | 4.27  |                     |          |                                                                           | 88833    | 39257   | 105473       | 39083   | 0.04299 | 0.42  | 1.40    |  |        | 1.19  |             |
| 559.3406@10.542826  | RP       | -               | 559.3406  | 10.54 |                     |          |                                                                           | 61650    | 13035   | 55762        | 12050   | 0.04343 | -0.47 | 1.28    |  |        | -1.10 |             |
| 414.3133@10.470846  | RP       | -               | 414.3133  | 10.47 |                     |          |                                                                           | 107298   | 23591   | 118899       | 25616   | 0.04354 | 0.47  | 1.25    |  |        | 1.11  |             |
| 1378.1993@9.885283  | RP       | -               | 1378.1993 | 9.89  |                     |          |                                                                           | 88637    | 10726   | 97674        | 28568   | 0.04359 | 0.46  | 0.98    |  |        | 1.08  |             |
| 720.5177@11.710025  | RP       | +               | 720.5177  | 11.71 |                     |          |                                                                           | 514146   | 217443  | 615141       | 243490  | 0.04359 | 0.44  | 1.19    |  |        | 1.10  |             |
| 703.5157@11.760779  | RP       | +               | 703.5157  | 11.76 | PC(30:1)            | 2        | RP (+) 20V: 704.5244 --> 184.0729 (100), 704.5226 (62)                    | 265228   | 74654   | 332446       | 189016  | 0.04373 | 0.51  | 1.45    |  |        | 1.17  |             |
| 204.0274@6.0871534  | HILIC    | -               | 204.0274  | 6.09  |                     |          |                                                                           | 67951    | 13683   | 74584        | 16166   | 0.04376 | 0.44  | 0.99    |  |        | 1.11  |             |
| 512.2983@3.9010382  | HILIC    | -               | 512.2983  | 3.90  |                     |          |                                                                           | 328846   | 116014  | 391792       | 159435  | 0.04386 | 0.46  | 1.43    |  |        | 1.18  |             |
| 272.077@3.9878182   | HILIC    | -               | 272.0770  | 3.99  |                     |          |                                                                           | 36282    | 6241    | 33548        | 5119    | 0.04390 | -0.48 | 1.16    |  |        | -1.08 |             |
| 83.0369@6.1005697   | HILIC    | +               | 83.0369   | 6.10  |                     |          |                                                                           | 50754    | 16186   | 58527        | 15992   | 0.04406 | 0.48  | 1.17    |  |        | 1.15  |             |
| 428.1707@10.714474  | RP       | -               | 428.1707  | 10.71 |                     |          |                                                                           | 201810   | 58151   | 185848       | 67437   | 0.04410 | -0.25 | 0.66    |  |        | -1.14 |             |
| 749.5232@11.751743  | RP       | -               | 749.5232  | 11.75 |                     |          |                                                                           | 140349   | 42273   | 164044       | 88588   | 0.04414 | 0.36  | 1.23    |  |        | 1.13  |             |
| 264.111@3.4249048   | RP       | +               | 264.1110  | 3.42  |                     |          |                                                                           | 156218   | 79988   | 135977       | 118517  | 0.04468 | -0.20 | 1.26    |  |        | -1.27 |             |
| 486.3744@12.601243  | RP       | +               | 486.3744  | 12.60 |                     |          |                                                                           | 393368   | 51135   | 371959       | 66171   | 0.04474 | -0.37 | 0.98    |  |        | -1.06 |             |
| 716.5469@1.1019707  | HILIC    | +               | 716.5469  | 1.10  |                     |          |                                                                           | 75651    | 13409   | 84411        | 21375   | 0.04490 | 0.50  | 1.41    |  |        | 1.10  |             |
| 161.1163@3.7261555  | HILIC    | +               | 161.1163  | 3.73  |                     |          |                                                                           | 44883    | 6223    | 48620        | 9027    | 0.04522 | 0.49  | 1.13    |  |        | 1.07  |             |
| 869.5394@12.066666  | RP       | -               | 869.5394  | 12.07 |                     |          |                                                                           | 202182   | 64926   | 230131       | 109561  | 0.04558 | 0.32  | 1.06    |  |        | 1.14  |             |
| 463.276@1.3743294   | HILIC    | +               | 463.2760  | 1.37  |                     |          |                                                                           | 98507    | 64082   | 132000       | 92020   | 0.04565 | 0.43  | 1.09    |  |        | 1.31  |             |
| 512.2787@9.833416   | RP       | -               | 512.2787  | 9.83  |                     |          |                                                                           | 1125318  | 885610  | 767246       | 722652  | 0.04605 | -0.45 | 1.10    |  |        | -1.35 |             |
| 146.0694@6.0891933  | HILIC    | -               | 146.0694  | 6.09  | Glutamine           | 1        | Hilic (-) 10ev: 145.0615 --> 145.0623 (100), 127.0513 (99), 109.0407 (38) | 1250730  | 486305  | 1502159      | 638227  | 0.04676 | 0.45  | 1.21    |  |        | 1.25  |             |
| 280.2391@10.714261  | RP       | +               | 280.2391  | 10.71 |                     |          |                                                                           | 72337    | 32475   | 60742        | 34081   | 0.04691 | -0.35 | 0.90    |  |        | -1.19 |             |
| 589.3383@10.092026  | RP       | -               | 589.3383  | 10.09 | LysoPC(20:4) [M+FA] | 2        | RP (-) 40ev: 588.3298 --> 303.2343 (100)                                  | 3606293  | 651863  | 3328325      | 656827  | 0.04700 | -0.42 | 1.05    |  |        | -1.09 |             |
| 379.2475@9.865471   | RP       | +               | 379.2475  | 9.87  |                     |          |                                                                           | 83091    | 20824   | 93752        | 35440   | 0.04724 | 0.38  | 0.92    |  |        | 1.13  |             |
| 280.2409@10.71369   | RP       | -               | 280.2409  | 10.71 | FA(18:2)            | 2        | RP (-) 20ev: 279.2333 --> 279.2336 (100)                                  | 1420322  | 589183  | 1229133      | 624158  | 0.04743 | -0.32 | 0.82    |  |        | -1.19 |             |
| 569.3699@10.542644  | RP       | -               | 569.3699  | 10.54 |                     |          |                                                                           | 664426   | 151649  | 596803       | 132282  | 0.04743 | -0.48 | 1.31    |  |        | -1.11 |             |
| 661.2675@10.082908  | RP       | -               | 661.2675  | 10.08 |                     |          |                                                                           | 107442   | 11226   | 102829       | 11988   | 0.04766 | -0.40 | 0.99    |  |        | -1.05 |             |
| 367.1945@10.932657  | RP       | +               | 367.1945  | 10.93 |                     |          |                                                                           | 188117   | 82483   | 164435       | 76120   | 0.04799 | -0.30 | 1.00    |  |        | -1.15 |             |
| 430.2011@6.905705   | RP       | -               | 430.2011  | 6.91  |                     |          |                                                                           | 238178   | 115636  | 193498       | 81769   | 0.04833 | -0.45 | 1.22    |  |        | -1.20 |             |
| 821.5248@12.55157   | RP       | +               | 821.5248  | 12.55 |                     |          |                                                                           | 393830   | 172789  | 463235       | 128022  | 0.04842 | 0.46  | 1.06    |  |        | 1.12  |             |
| 242.1278@1.8193783  | HILIC    | +               | 242.1278  | 1.82  |                     |          |                                                                           | 423054   | 248564  | 526925       | 281648  | 0.04856 | 0.39  | 1.00    |  |        | 1.27  |             |
| 609.5329@13.715334  | RP       | +               | 609.5329  | 13.72 |                     |          |                                                                           | 72100    | 30427   | 89012        | 44663   | 0.04864 | 0.45  | 1.11    |  |        | 1.21  |             |
| 296.2142@6.6941433  | RP       | +               | 296.2142  | 6.69  |                     |          |                                                                           | 86227    | 37990   | 74204        | 48043   | 0.04911 | -0.28 | 0.89    |  |        | -1.27 |             |
| 384.3391@12.567641  | RP       | +               | 384.3391  | 12.57 |                     |          |                                                                           | 506390   | 93574   | 589276       | 223257  | 0.04915 | 0.52  | 1.24    |  |        | 1.11  |             |
| 118.0266@1.1084707  | HILIC    | -               | 118.0266  | 1.11  | Succinic acid       | 1        | Hilic (-) 10ev: 117.0195 --> 73.0296 (100)                                | 50974    | 30352   | 64155        | 55800   | 0.04943 | 0.31  | 0.84    |  |        | 1.17  |             |
| 358.0618@1.4588267  | HILIC    | -               | 358.0618  | 1.46  |                     |          |                                                                           | 130647   | 35030   | 116253       | 43820   | 0.04995 | -0.37 | 1.07    |  |        | -1.15 |             |

Legend: RT, retention time; ID level, level of identification: 1 = against in-house library, 2 = against public MSMS spectral library, 3 = compound class based on MSMS fragmentation; molecular feature is unknown if identification field is empty.

For t-test the  $\alpha$ -level was 0.00065 after correction for multiple testing; molecular features with p-value < 0.00065 are shown with gray background
